# Supplementary material for: Factors constraining natural recovery of Diadema antillarum following a mass die-off: a case study near the island of Saba, Caribbean Netherlands
Source: PeerJ. 2025 Dec 17;13:e20418. doi: 10.7717/peerj.20418 (PMC12717850; doi:10.7717/peerj.20418)
Supplement: Supplemental Information 2 [file peerj-13-20418-s002.xlsx]

## Sheet: Meta
Data used for the manuscript: Factors constraining natural recovery of Diadema antillarum following a mass die-off: a case study near Saba, Caribbean Netherlands
Authors: Alwin Hylkema, Oliver Klokman
Contact: alwin.hylkema@hvhl.nl
See manuscript for methods.
Date	date of survey
Survey	1, 2, or 3. All locations were surveyed 3 times
Researcher	AH (Alwin Hylkema) or OK (Oliver Klokman)
Transect	1, 2, or 3. 3 transects per location
Tab Fish transects
Raw Diadema fish predator counts and size estimation using transect survey
Fish biomass calculations
Predation pressure calculations
Tab Fish per species per 100 m2
Data from Fish transects, standardized per species and per 100 m2
Tab Fish total 1002
Data from Fish per species per 100 m2, summed per location and transect
Tab Fish roving
Raw Diadema fish predator counts and size estimation using roving diver survey
Fish biomass calculations
Predation pressure calculations
Tab Roving per species
Data from Fish roving, standardized per species
Tab Fish total 1002
Data from Roving per species, summed per location
Tab Diadema count
Counts per location per transect in 2022 (directly post die-off) and 2023 (1y post die-off)
Tab invertebrate transects
Raw invertebrate counts using transect surveys
Tab inverts per 100m2
Data from Invertebrate transects, standardized per species per 100m2
Tab inverts per 100m2 total
Data from Inverts per 100 m2, summed per location and transect
Tab Depth measurements
Depth measurements of start and end of each semi-permanent transect

## Sheet: Fish Transects
Date	Survey	Researcher	Location	Transect	Visibility (m)	Depth (m)	common name	latin name	size class (cm)	number	Size	a	b	conversion	biomass	Echinoid_in_stomach	Predation_pressure	number_m2	biomass_m2	predation_pressure_m2
2023-05-04	1	AH	Ladder bay	1	15	10	Spanish hogfish	B. rufus	15-20	1	17.5	0.0144	3.053	1	89.8168	14.4	12.9336	0.0166667	1.49695	0.21556
2023-05-04	1	AH	Ladder bay	1	15	10	Spanish hogfish	B. rufus	20-25	2	22.5	0.0144	3.053	1	386.906	14.4	55.7145	0.0333333	6.44844	0.928575
2023-05-04	1	AH	Ladder bay	1	15	10	Spanish hogfish	B. rufus	25-30	1	27.5	0.0144	3.053	1	356.981	14.4	51.4053	0.0166667	5.94968	0.856755
2023-05-04	1	AH	Ladder bay	1	15	10	Yellowhead wrasse	H. garnoti	10-15	1	12.5	0.00519	3.375	1	26.136	3	0.784079	0.0166667	0.4356	0.013068
2023-05-04	1	AH	Ladder bay	1	15	10	Bluehead	T. bifasciatum	0-5	43	2.5	0.0107	2.916	1	6.65649	1.5	0.0998474	71.6667	11.0942	0.166412
2023-05-04	1	AH	Ladder bay	1	15	10	Bluehead	T. bifasciatum	5-10	12	7.5	0.0107	2.916	1	45.7345	1.5	0.686017	20	76.2241	1.14336
2023-05-04	1	AH	Ladder bay	1	15	10	Black Margate	A. surinamensis	5-10	1	7.5	0.0117	3.2	0.868056	4.69606	53.5	2.51239	1.66667	7.82677	4.18732
2023-05-04	1	AH	Ladder bay	1	15	10	Caesar grunt	H. carbonarium	15-20	1	17.5	0.0404	2.74	0.929368	84.1666	10.9	9.17416	1.66667	140.278	15.2903
2023-05-04	1	AH	Ladder bay	1	15	10	Caesar grunt	H. carbonarium	20-25	1	22,5	0.0404	2.74	0.929368	167.57	10.9	18.2651	1.66667	279.283	30.4419
2023-05-04	1	AH	Ladder bay	2	15	7	Spanish hogfish	B. rufus	20-25	1	22.5	0.0144	3.053	1	193.453	14.4	27.8572	1.66667	322.422	46.4287
2023-05-04	1	AH	Ladder bay	2	15	7	Bluehead	T. bifasciatum	0-5	61	2.5	0.0107	2.916	1	9.44293	1.5	0.141644	101.667	15.7382	0.236073
2023-05-04	1	AH	Ladder bay	2	15	7	Bluehead	T. bifasciatum	5-10	26	7.5	0.0107	2.916	1	99.0914	1.5	1.48637	43.3333	165.152	2.47728
2023-05-04	1	AH	Ladder bay	2	15	7	Black Margate	A. surinamensis	25-30	1	27.5	0.0117	3.2	0.868056	300.194	53.5	160.604	1.66667	500.324	267.673
2023-05-04	1	AH	Ladder bay	2	15	7	Black Margate	A. surinamensis	30-35	1	32.5	0.0117	3.2	0.868056	512.348	53.5	274.106	1.66667	853.913	456.843
2023-05-04	1	AH	Ladder bay	2	15	7	Caesar grunt	H. carbonarium	25-30	2	27.5	0.0404	2.74	0.929368	580.788	10.9	63.3058	3.33333	967.979	105.51
2023-05-04	1	AH	Ladder bay	3	15	7	Yellowhead wrasse	H. garnoti	0-5	3	2.5	0.00519	3.375	1	0.343033	3	0.010291	5	0.571722	0.0171517
2023-05-04	1	AH	Ladder bay	3	15	7	Yellowhead wrasse	H. garnoti	10-15	2	12.5	0.00519	3.375	1	52.2719	3	1.56816	3.33333	87.1199	2.6136
2023-05-04	1	AH	Ladder bay	3	15	7	Yellowhead wrasse	H. garnoti	20-25	1	22.5	0.00519	3.375	1	190.013	3	5.70039	1.66667	316.688	9.50065
2023-05-04	1	AH	Ladder bay	3	15	7	Bluehead	T. bifasciatum	0-5	40	2.5	0.0107	2.916	1	6.19208	1.5	0.0928813	66.6667	10.3201	0.154802
2023-05-04	1	AH	Ladder bay	3	15	7	Bluehead	T. bifasciatum	5-10	44	7.5	0.0107	2.916	1	167.693	1.5	2.5154	73.3333	279.488	4.19233
2023-05-04	1	AH	Ladder bay	3	15	7	Caesar grunt	H. carbonarium	25-30	1	27.5	0.0404	2.74	0.929368	290.394	10.9	31.6529	1.66667	483.99	52.7549
2023-05-04	1	AH	Torrens point	3	10	8	Spanish hogfish	B. rufus	10-15	1	12.5	0.0144	3.053	1	32.1535	14.4	4.63011	1.66667	53.5892	7.71685
2023-05-04	1	AH	Torrens point	3	10	8	Yellowhead wrasse	H. garnoti	0-5	40	2.5	0.00519	3.375	1	4.57378	3	0.137213	66.6667	7.62296	0.228689
2023-05-04	1	AH	Torrens point	3	10	8	Yellowhead wrasse	H. garnoti	5-10	4	7.5	0.00519	3.375	1	18.6449	3	0.559346	6.66667	31.0748	0.932243
2023-05-04	1	AH	Torrens point	3	10	8	Bluehead	T. bifasciatum	0-5	80	2.5	0.0107	2.916	1	12.3842	1.5	0.185763	133.333	20.6403	0.309604
2023-05-04	1	AH	Torrens point	3	10	8	Bluehead	T. bifasciatum	5-10	17	7.5	0.0107	2.916	1	64.7905	1.5	0.971858	28.3333	107.984	1.61976
2023-05-04	1	AH	Torrens point	3	10	8	Bluehead	T. bifasciatum	10-15	1	12.5	0.0107	2.916	1	16.9034	1.5	0.253551	1.66667	28.1723	0.422584
2023-05-04	1	AH	Torrens point	3	10	8	Blackear wrasse	H. poeyi	5-10	1	7.5	0.011	3.08	1	5.45232	6.8	0.370758	1.66667	9.0872	0.61793
2023-05-04	1	AH	Torrens point	1	10	7	Yellowhead wrasse	H. garnoti	5-10	4	7.5	0.00519	3.375	1	18.6449	3	0.559346	6.66667	31.0748	0.932243
2023-05-04	1	AH	Torrens point	1	10	7	Bluehead	T. bifasciatum	0-5	120	2.5	0.0107	2.916	1	18.5763	1.5	0.278644	200	30.9604	0.464406
2023-05-04	1	AH	Torrens point	1	10	7	Bluehead	T. bifasciatum	5-10	11	7.5	0.0107	2.916	1	41.9233	1.5	0.628849	18.3333	69.8721	1.04808
2023-05-04	1	AH	Torrens point	1	10	7	Bluehead	T. bifasciatum	10-15	2	12.5	0.0107	2.916	1	33.8067	1.5	0.507101	3.33333	56.3446	0.845169
2023-05-04	1	AH	Torrens point	1	10	7	Caesar grunt	H. carbonarium	25-30	3	27.5	0.0404	2.74	0.929368	871.181	10.9	94.9588	5	1451.97	158.265
2023-05-04	1	AH	Torrens point	2	10	9	Sharpnose puffer	C. rostrata	5-10	1	7.5	0.0729	2.5	1	11.23	3.8	0.426741	1.66667	18.7167	0.711235
2023-05-04	1	AH	Torrens point	2	10	9	Yellowhead wrasse	H. garnoti	5-10	5	7.5	0.00519	3.375	1	23.3061	3	0.699182	8.33333	38.8435	1.1653
2023-05-04	1	AH	Torrens point	2	10	9	Bluehead	T. bifasciatum	0-5	100	2.5	0.0107	2.916	1	15.4802	1.5	0.232203	166.667	25.8003	0.387005
2023-05-04	1	AH	Torrens point	2	10	9	Bluehead	T. bifasciatum	5-10	5	7.5	0.0107	2.916	1	19.056	1.5	0.28584	8.33333	31.76	0.476401
2023-05-04	1	AH	Torrens point	2	10	9	Bluehead	T. bifasciatum	10-15	1	12.5	0.0107	2.916	1	16.9034	1.5	0.253551	1.66667	28.1723	0.422584
2023-05-04	1	AH	Torrens point	2	10	9	Caesar grunt	H. carbonarium	25-30	1	27.5	0.0404	2.74	0.929368	290.394	10.9	31.6529	1.66667	483.99	52.7549
2023-05-04	1	AH	Torrens point	2	10	9	French grunt	H. flavolineatum	10-15	1	12.5	0.017	3.05	0.917431	28.965	1.5	0.434475	1.66667	48.275	0.724125
2023-05-04	1	AH	Torrens point	2	10	9	French grunt	H. flavolineatum	15-20	4	17.5	0.017	3.05	0.917431	323.314	1.5	4.84971	6.66667	538.856	8.08284
2023-05-04	1	AH	Torrens point	2	10	9	French grunt	H. flavolineatum	20-25	1	22.5	0.017	3.05	0.917431	173.962	1.5	2.60943	1.66667	289.937	4.34905
2023-05-09	1	AH	Tent reef	1	10	6	Yellowhead wrasse	H. garnoti	0-5	172	2.5	0.00519	3.375	1	19.6672	3	0.590017	286.667	32.7787	0.983362
2023-05-09	1	AH	Tent reef	1	10	6	Bluehead	T. bifasciatum	5-10	10	7.5	0.0107	2.916	1	38.1121	1.5	0.571681	16.6667	63.5201	0.952801
2023-05-09	1	AH	Tent reef	1	10	6	Spanish hogfish	B. rufus	20-25	1	22.5	0.0144	3.053	1	193.453	14.4	27.8572	1.66667	322.422	46.4287
2023-05-09	1	AH	Tent reef	2	10	5	Spanish hogfish	B. rufus	15-20	1	17.5	0.0144	3.053	1	89.8168	14.4	12.9336	1.66667	149.695	21.556
2023-05-09	1	AH	Tent reef	2	10	5	Spanish hogfish	B. rufus	20-25	1	22.5	0.0144	3.053	1	193.453	14.4	27.8572	1.66667	322.422	46.4287
2023-05-09	1	AH	Tent reef	2	10	5	Spanish hogfish	B. rufus	25-30	1	27.5	0.0144	3.053	1	356.981	14.4	51.4053	1.66667	594.968	85.6755
2023-05-09	1	AH	Tent reef	2	10	5	Yellowhead wrasse	H. garnoti	5-10	2	7.5	0.00519	3.375	1	9.32243	3	0.279673	3.33333	15.5374	0.466121
2023-05-09	1	AH	Tent reef	2	10	5	Bluehead	T. bifasciatum	5-10	53	7.5	0.0107	2.916	1	201.994	1.5	3.02991	88.3333	336.657	5.04985
2023-05-09	1	AH	Tent reef	2	10	5	Bluehead	T. bifasciatum	0-5	380	2.5	0.0107	2.916	1	58.8248	1.5	0.882372	633.333	98.0413	1.47062
2023-05-09	1	AH	Tent reef	3	10	5	Puddingwife	H. radiatus	30-35	1	32.5	0.0131	3.038	1	513.302	19.9	102.147	1.66667	855.503	170.245
2023-05-09	1	AH	Tent reef	3	10	5	Yellowhead wrasse	H. garnoti	0-5	3	2.5	0.00519	3.375	1	0.343033	3	0.010291	5	0.571722	0.0171517
2023-05-09	1	AH	Tent reef	3	10	5	Bluehead	T. bifasciatum	0-5	300	2.5	0.0107	2.916	1	46.4406	1.5	0.696609	500	77.401	1.16102
2023-05-09	1	AH	Tent reef	3	10	5	Bluehead	T. bifasciatum	5-10	57	7.5	0.0107	2.916	1	217.239	1.5	3.25858	95	362.065	5.43097
2023-05-09	1	AH	Diadema city	1	10	8	Yellowhead wrasse	H. garnoti	0-5	22	2.5	0.00519	3.375	1	2.51558	3	0.0754673	36.6667	4.19263	0.125779
2023-05-09	1	AH	Diadema city	1	10	8	Yellowhead wrasse	H. garnoti	10-15	1	12.5	0.00519	3.375	1	26.136	3	0.784079	1.66667	43.56	1.3068
2023-05-09	1	AH	Diadema city	1	10	8	Bluehead	T. bifasciatum	0-5	60	2.5	0.0107	2.916	1	9.28813	1.5	0.139322	100	15.4802	0.232203
2023-05-09	1	AH	Diadema city	1	10	8	French grunt	H. flavolineatum	10-15	1	12.5	0.017	3.05	0.917431	28.965	1.5	0.434475	1.66667	48.275	0.724125
2023-05-09	1	AH	Diadema city	1	10	8	French grunt	H. flavolineatum	15-20	8	17.5	0.017	3.05	0.917431	646.627	1.5	9.69941	13.3333	1077.71	16.1657
2023-05-09	1	AH	Diadema city	2	10	7	Bluehead	T. bifasciatum	5-10	4	7.5	0.0107	2.916	1	15.2448	1.5	0.228672	6.66667	25.408	0.381121
2023-05-09	1	AH	Diadema city	2	10	7	Bluehead	T. bifasciatum	0-5	5	2.5	0.0107	2.916	1	0.77401	1.5	0.0116102	8.33333	1.29002	0.0193503
2023-05-09	1	AH	Diadema city	2	10	7	French grunt	H. flavolineatum	10-15	1	12.5	0.017	3.05	0.917431	28.965	1.5	0.434475	1.66667	48.275	0.724125
2023-05-09	1	AH	Diadema city	2	10	7	French grunt	H. flavolineatum	10-25	1	17.5	0.017	3.05	0.917431	80.8284	1.5	1.21243	1.66667	134.714	2.02071
2023-05-09	1	AH	Diadema city	3	10	7	Yellowhead wrasse	H. garnoti	0-5	12	2.5	0.00519	3.375	1	1.37213	3	0.041164	20	2.28689	0.0686066
2023-05-09	1	AH	Diadema city	3	10	7	Bluehead	T. bifasciatum	0-5	110	2.5	0.0107	2.916	1	17.0282	1.5	0.255423	183.333	28.3804	0.425706
2023-05-09	1	AH	Diadema city	3	10	7	Bluehead	T. bifasciatum	5-10	2	7.5	0.0107	2.916	1	7.62241	1.5	0.114336	3.33333	12.704	0.19056
2023-05-09	1	AH	Diadema city	3	10	7	Caesar grunt	H. carbonarium	25-30	1	27.5	0.0404	2.74	0.929368	290.394	10.9	31.6529	1.66667	483.99	52.7549
2023-05-09	1	AH	Diadema city	3	10	7	French grunt	H. flavolineatum	20-25	1	22.5	0.017	3.05	0.917431	173.962	1.5	2.60943	1.66667	289.937	4.34905
2023-07-13	2	AH	Torrens point	1	15	9	Yellowhead wrasse	H. garnoti	0-5	3	2.5	0.00519	3.375	1	0.343033	3	0.010291	5	0.571722	0.0171517
2023-07-13	2	AH	Torrens point	1	15	9	Yellowhead wrasse	H. garnoti	5-10	1	7.5	0.00519	3.375	1	4.66121	3	0.139836	1.66667	7.76869	0.233061
2023-07-13	2	AH	Torrens point	1	15	9	Bluehead	T. bifasciatum	5-10	25	7.5	0.0107	2.916	1	95.2801	1.5	1.4292	41.6667	158.8	2.382
2023-07-13	2	AH	Torrens point	1	15	9	Bluehead	T. bifasciatum	0-5	140	2.5	0.0107	2.916	1	21.6723	1.5	0.325084	233.333	36.1205	0.541807
2023-07-13	2	AH	Torrens point	2	15	9	Spanish hogfish	B. rufus	15-20	1	17.5	0.0144	3.053	1	89.8168	14.4	12.9336	1.66667	149.695	21.556
2023-07-13	2	AH	Torrens point	2	15	9	Yellowhead wrasse	H. garnoti	0-5	2	2.5	0.00519	3.375	1	0.228689	3	0.00686066	3.33333	0.381148	0.0114344
2023-07-13	2	AH	Torrens point	2	15	9	Yellowhead wrasse	H. garnoti	5-10	3	7.5	0.00519	3.375	1	13.9836	3	0.419509	5	23.3061	0.699182
2023-07-13	2	AH	Torrens point	2	15	9	Bluehead	T. bifasciatum	10-15	1	12.5	0.0107	2.916	1	16.9034	1.5	0.253551	1.66667	28.1723	0.422584
2023-07-13	2	AH	Torrens point	2	15	9	Bluehead	T. bifasciatum	0-5	220	2.5	0.0107	2.916	1	34.0565	1.5	0.510847	366.667	56.7608	0.851412
2023-07-13	2	AH	Torrens point	3	15	8	Yellowhead wrasse	H. garnoti	0-5	1	2.5	0.00519	3.375	1	0.114344	3	0.00343033	1.66667	0.190574	0.00571722
2023-07-13	2	AH	Torrens point	3	15	8	Yellowhead wrasse	H. garnoti	5-10	3	7.5	0.00519	3.375	1	13.9836	3	0.419509	5	23.3061	0.699182
2023-07-13	2	AH	Torrens point	3	15	8	Bluehead	T. bifasciatum	0-5	160	2.5	0.0107	2.916	1	24.7683	1.5	0.371525	266.667	41.2806	0.619208
2023-07-13	2	AH	Torrens point	3	15	8	Black Margate	A. surinamensis	25-30	1	27.5	0.0117	3.2	0.868056	300.194	53.5	160.604	1.66667	500.324	267.673
2023-07-13	2	AH	Torrens point	3	15	8	Caesar grunt	H. carbonarium	20-25	12	22.5	0.0404	2.74	0.929368	2010.84	10.9	219.181	20	3351.4	365.302
2023-07-13	2	AH	Torrens point	3	15	8	French grunt	H. flavolineatum	15-20	1	17.5	0.017	3.05	0.917431	80.8284	1.5	1.21243	1.66667	134.714	2.02071
2023-07-13	2	AH	Ladder bay	1	15	9	Spanish hogfish	B. rufus	15-20	1	17.5	0.0144	3.053	1	89.8168	14.4	12.9336	1.66667	149.695	21.556
2023-07-13	2	AH	Ladder bay	1	15	9	Spanish hogfish	B. rufus	20-25	1	22.5	0.0144	3.053	1	193.453	14.4	27.8572	1.66667	322.422	46.4287
2023-07-13	2	AH	Ladder bay	1	15	9	Yellowhead wrasse	H. garnoti	0-5	1	2.5	0.00519	3.375	1	0.114344	3	0.00343033	1.66667	0.190574	0.00571722
2023-07-13	2	AH	Ladder bay	1	15	9	Bluehead	T. bifasciatum	0-5	82	2.5	0.0107	2.916	1	12.6938	1.5	0.190407	136.667	21.1563	0.317344
2023-07-13	2	AH	Ladder bay	1	15	9	Bluehead	T. bifasciatum	5-10	22	7.5	0.0107	2.916	1	83.8465	1.5	1.2577	36.6667	139.744	2.09616
2023-07-13	2	AH	Ladder bay	2	15	7	Spotted trunkfish	L.bicaudalis	10-15	1	12.5	0.0295	3	1	57.6172	10	5.76172	1.66667	96.0286	9.60286
2023-07-13	2	AH	Ladder bay	2	15	7	Yellowhead wrasse	H. garnoti	0-5	11	2.5	0.00519	3.375	1	1.25779	3	0.0377337	18.3333	2.09631	0.0628894
2023-07-13	2	AH	Ladder bay	2	15	7	Yellowhead wrasse	H. garnoti	5-10	15	7.5	0.00519	3.375	1	69.9182	3	2.09755	25	116.53	3.49591
2023-07-13	2	AH	Ladder bay	2	15	7	Yellowhead wrasse	H. garnoti	15-20	1	17.5	0.00519	3.375	1	81.3618	3	2.44086	1.66667	135.603	4.06809
2023-07-13	2	AH	Ladder bay	2	15	7	Bluehead	T. bifasciatum	0-5	65	2.5	0.0107	2.916	1	10.0621	1.5	0.150932	108.333	16.7702	0.251553
2023-07-13	2	AH	Ladder bay	2	15	7	Bluehead	T. bifasciatum	5-10	17	7.5	0.0107	2.916	1	64.7905	1.5	0.971858	28.3333	107.984	1.61976
2023-07-13	2	AH	Ladder bay	2	15	7	Bluehead	T. bifasciatum	10-15	1	12.5	0.0107	2.916	1	16.9034	1.5	0.253551	1.66667	28.1723	0.422584
2023-07-13	2	AH	Ladder bay	3	15	6	Yellowhead wrasse	H. garnoti	0-5	3	2.5	0.00519	3.375	1	0.343033	3	0.010291	5	0.571722	0.0171517
2023-07-13	2	AH	Ladder bay	3	15	6	Bluehead	T. bifasciatum	0-5	142	2.5	0.0107	2.916	1	21.9819	1.5	0.329728	236.667	36.6365	0.549547
2023-07-13	2	AH	Ladder bay	3	15	6	Bluehead	T. bifasciatum	5-10	27	7.5	0.0107	2.916	1	102.903	1.5	1.54354	45	171.504	2.57256
2023-07-13	2	AH	Ladder bay	3	15	6	Bluehead	T. bifasciatum	10-15	2	12.5	0.0107	2.916	1	33.8067	1.5	0.507101	3.33333	56.3446	0.845169
2023-08-22	2	AH	Tent reef	1	10	6	Bandtail puffer	S. spengleri	10-15	1	12.5	0.209	0.2354	1	0.378755	6.9	0.0261341	1.66667	0.631259	0.0435569
2023-08-22	2	AH	Tent reef	1	10	6	Smooth trunkfish	L. triqueter	10-15	1	12.5	0.309	2.23	1	86.3113	2.3	1.98516	1.66667	143.852	3.3086
2023-08-22	2	AH	Tent reef	1	10	6	Yellowhead wrasse	H. garnoti	5-10	20	7.5	0.00519	3.375	1	93.2243	3	2.79673	33.3333	155.374	4.66121
2023-08-22	2	AH	Tent reef	1	10	6	Bluehead	T. bifasciatum	10-15	2	12.5	0.0107	2.916	1	33.8067	1.5	0.507101	3.33333	56.3446	0.845169
2023-08-22	2	AH	Tent reef	1	10	6	Bluehead	T. bifasciatum	0-5	40	2.5	0.0107	2.916	1	6.19208	1.5	0.0928813	66.6667	10.3201	0.154802
2023-08-22	2	AH	Tent reef	1	10	6	Bluehead	T. bifasciatum	5-10	400	7.5	0.0107	2.916	1	1524.48	1.5	22.8672	666.667	2540.8	38.1121
2023-08-22	2	AH	Tent reef	2	10	6	Smooth trunkfish	L. triqueter	5-10	1	7.5	0.309	2.23	1	27.6277	2.3	0.635438	1.66667	46.0462	1.05906
2023-08-22	2	AH	Tent reef	2	10	6	Smooth trunkfish	L. triqueter	15-20	1	17.5	0.309	2.23	1	182.782	2.3	4.20399	1.66667	304.637	7.00664
2023-08-22	2	AH	Tent reef	2	10	6	Spanish hogfish	B. rufus	25-30	4	27.5	0.0144	3.053	1	1427.92	14.4	205.621	6.66667	2379.87	342.702
2023-08-22	2	AH	Tent reef	2	10	6	Bluehead	T. bifasciatum	0-5	3	2.5	0.0107	2.916	1	0.464406	1.5	0.00696609	5	0.77401	0.0116102
2023-08-22	2	AH	Tent reef	2	10	6	Bluehead	T. bifasciatum	5-10	180	7.5	0.0107	2.916	1	686.017	1.5	10.2903	300	1143.36	17.1504
2023-08-22	2	AH	Tent reef	2	10	6	Bluehead	T. bifasciatum	10-15	1	12.5	0.0107	2.916	1	16.9034	1.5	0.253551	1.66667	28.1723	0.422584
2023-08-22	2	AH	Tent reef	3	15	5	Honeycomb cowfish	A. polygonia	25-30	1	27.5	0.00516	3.346	1	337.798	0	0	1.66667	562.996	0
2023-08-22	2	AH	Tent reef	3	15	5	Spanish hogfish	B. rufus	25-30	2	27.5	0.0144	3.053	1	713.962	14.4	102.811	3.33333	1189.94	171.351
2023-08-22	2	AH	Tent reef	3	15	5	Bluehead	T. bifasciatum	0-5	140	2.5	0.0107	2.916	1	21.6723	1.5	0.325084	233.333	36.1205	0.541807
2023-08-22	2	AH	Tent reef	3	15	5	Bluehead	T. bifasciatum	5-10	320	7.5	0.0107	2.916	1	1219.59	1.5	18.2938	533.333	2032.64	30.4896
2023-08-22	2	AH	Tent reef	3	15	5	Bluehead	T. bifasciatum	10-15	3	12.5	0.0107	2.916	1	50.7101	1.5	0.760652	5	84.5169	1.26775
2023-08-22	2	AH	Diadema city	1	15	7	Yellowhead wrasse	H. garnoti	0-5	2	2.5	0.00519	3.375	1	0.228689	3	0.00686066	3.33333	0.381148	0.0114344
2023-08-22	2	AH	Diadema city	1	15	7	Yellowhead wrasse	H. garnoti	5-10	5	7.5	0.00519	3.375	1	23.3061	3	0.699182	8.33333	38.8435	1.1653
2023-08-22	2	AH	Diadema city	1	15	7	Bluehead	T. bifasciatum	0-5	35	2.5	0.0107	2.916	1	5.41807	1.5	0.0812711	58.3333	9.03012	0.135452
2023-08-22	2	AH	Diadema city	1	15	7	French grunt	H. flavolineatum	10-15	2	12.5	0.017	3.05	0.917431	57.93	1.5	0.86895	3.33333	96.55	1.44825
2023-08-22	2	AH	Diadema city	1	15	7	French grunt	H. flavolineatum	15-20	1	17.5	0.017	3.05	0.917431	80.8284	1.5	1.21243	1.66667	134.714	2.02071
2023-08-22	2	AH	Diadema city	1	15	7	French grunt	H. flavolineatum	25-30	1	27.5	0.017	3.05	0.917431	320.821	1.5	4.81232	1.66667	534.702	8.02053
2023-08-22	2	AH	Diadema city	1	15	7	Caesar grunt	H. carbonarium	25-30	1	27.5	0.0404	2.74	0.929368	290.394	10.9	31.6529	1.66667	483.99	52.7549
2023-08-22	2	AH	Diadema city	2	15	8	Yellowhead wrasse	H. garnoti	0-5	2	2.5	0.00519	3.375	1	0.228689	3	0.00686066	3.33333	0.381148	0.0114344
2023-08-22	2	AH	Diadema city	2	15	8	Bluehead	T. bifasciatum	0-5	70	2.5	0.0107	2.916	1	10.8361	1.5	0.162542	116.667	18.0602	0.270904
2023-08-22	2	AH	Diadema city	2	15	8	French grunt	H. flavolineatum	10-15	1	12.5	0.017	3.05	0.917431	28.965	1.5	0.434475	1.66667	48.275	0.724125
2023-08-22	2	AH	Diadema city	2	15	8	French grunt	H. flavolineatum	15-20	4	17.5	0.017	3.05	0.917431	323.314	1.5	4.84971	6.66667	538.856	8.08284
2023-08-22	2	AH	Diadema city	3	15	8	Smooth trunkfish	L. triqueter	5-10	1	7.5	0.309	2.23	1	27.6277	2.3	0.635438	1.66667	46.0462	1.05906
2023-08-22	2	AH	Diadema city	3	15	8	Puddingwife	H. radiatus	5-10	1	7.5	0.0131	3.038	1	5.96633	19.9	1.1873	1.66667	9.94389	1.97883
2023-08-22	2	AH	Diadema city	3	15	8	Blackear wrasse	H. poeyi	15-20	1	17.5	0.011	3.08	1	74.1225	6.8	5.04033	1.66667	123.537	8.40055
2023-08-22	2	AH	Diadema city	3	15	8	Yellowhead wrasse	H. garnoti	0-5	5	2.5	0.00519	3.375	1	0.571722	3	0.0171517	8.33333	0.95287	0.0285861
2023-08-22	2	AH	Diadema city	3	15	8	Yellowhead wrasse	H. garnoti	10-15	5	12.5	0.00519	3.375	1	130.68	3	3.9204	8.33333	217.8	6.53399
2023-08-22	2	AH	Diadema city	3	15	8	Bluehead	T. bifasciatum	10-15	1	12.5	0.0107	2.916	1	16.9034	1.5	0.253551	1.66667	28.1723	0.422584
2023-08-22	2	AH	Diadema city	3	15	8	Bluehead	T. bifasciatum	5-10	5	7.5	0.0107	2.916	1	19.056	1.5	0.28584	8.33333	31.76	0.476401
2023-08-22	2	AH	Diadema city	3	15	8	Bluehead	T. bifasciatum	0-5	90	2.5	0.0107	2.916	1	13.9322	1.5	0.208983	150	23.2203	0.348305
2023-08-22	2	AH	Diadema city	3	15	8	Caesar grunt	H. carbonarium	20-25	1	22.5	0.0404	2.74	0.929368	167.57	10.9	18.2651	1.66667	279.283	30.4419
2023-08-22	2	AH	Diadema city	3	15	8	French grunt	H. flavolineatum	15-20	1	17.5	0.017	3.05	0.917431	80.8284	1.5	1.21243	1.66667	134.714	2.02071
2023-08-22	2	AH	Diadema city	3	15	8	French grunt	H. flavolineatum	20-25	1	22.5	0.017	3.05	0.917431	173.962	1.5	2.60943	1.66667	289.937	4.34905
2023-08-28	3	AH	Ladder bay	1	10	9	Yellowhead wrasse	H. garnoti	5-10	7	7.5	0.00519	3.375	1	32.6285	3	0.978855	11.6667	54.3808	1.63143
2023-08-28	3	AH	Ladder bay	1	10	9	Yellowhead wrasse	H. garnoti	10-15	5	12.5	0.00519	3.375	1	130.68	3	3.9204	8.33333	217.8	6.53399
2023-08-28	3	AH	Ladder bay	1	10	9	Yellowhead wrasse	H. garnoti	15-20	1	17.5	0.00519	3.375	1	81.3618	3	2.44086	1.66667	135.603	4.06809
2023-08-28	3	AH	Ladder bay	1	10	9	Bluehead	T. bifasciatum	15-20	1	17.5	0.0107	2.916	1	45.0903	1.5	0.676354	1.66667	75.1504	1.12726
2023-08-28	3	AH	Ladder bay	1	10	9	Bluehead	T. bifasciatum	0-5	20	2.5	0.0107	2.916	1	3.09604	1.5	0.0464406	33.3333	5.16007	0.077401
2023-08-28	3	AH	Ladder bay	1	10	9	Bluehead	T. bifasciatum	5-10	120	7.5	0.0107	2.916	1	457.345	1.5	6.86017	200	762.241	11.4336
2023-08-28	3	AH	Ladder bay	1	10	9	Bluehead	T. bifasciatum	15-20	1	17.5	0.0107	2.916	1	45.0903	1.5	0.676354	1.66667	75.1504	1.12726
2023-08-28	3	AH	Ladder bay	2	10	8	Spanish hogfish	B. rufus	20-25	1	22.5	0.0144	3.053	1	193.453	14.4	27.8572	1.66667	322.422	46.4287
2023-08-28	3	AH	Ladder bay	2	10	8	Puddingwife	H. radiatus	10-15	1	12.5	0.0131	3.038	1	28.1633	19.9	5.6045	1.66667	46.9389	9.34084
2023-08-28	3	AH	Ladder bay	2	10	8	Blackear wrasse	H. poeyi	5-10	1	7.5	0.011	3.08	1	5.45232	6.8	0.370758	1.66667	9.0872	0.61793
2023-08-28	3	AH	Ladder bay	2	10	8	Yellowhead wrasse	H. garnoti	10-15	1	12.5	0.00519	3.375	1	26.136	3	0.784079	1.66667	43.56	1.3068
2023-08-28	3	AH	Ladder bay	2	10	8	Yellowhead wrasse	H. garnoti	15-20	1	17.5	0.00519	3.375	1	81.3618	3	2.44086	1.66667	135.603	4.06809
2023-08-28	3	AH	Ladder bay	2	10	8	Yellowhead wrasse	H. garnoti	20-25	1	22.5	0.00519	3.375	1	190.013	3	5.70039	1.66667	316.688	9.50065
2023-08-28	3	AH	Ladder bay	2	10	8	Bluehead	T. bifasciatum	10-15	1	12.5	0.0107	2.916	1	16.9034	1.5	0.253551	1.66667	28.1723	0.422584
2023-08-28	3	AH	Ladder bay	2	10	8	Bluehead	T. bifasciatum	0-5	40	2.5	0.0107	2.916	1	6.19208	1.5	0.0928813	66.6667	10.3201	0.154802
2023-08-28	3	AH	Ladder bay	2	10	8	Bluehead	T. bifasciatum	5-10	100	7.5	0.0107	2.916	1	381.121	1.5	5.71681	166.667	635.201	9.52801
2023-08-28	3	AH	Ladder bay	3	10	7	Yellowhead wrasse	H. garnoti	5-10	10	7.5	0.00519	3.375	1	46.6121	3	1.39836	16.6667	77.6869	2.33061
2023-08-28	3	AH	Ladder bay	3	10	7	Yellowhead wrasse	H. garnoti	20-25	1	22.5	0.00519	3.375	1	190.013	3	5.70039	1.66667	316.688	9.50065
2023-08-28	3	AH	Ladder bay	3	10	7	Bluehead	T. bifasciatum	0-5	60	2.5	0.0107	2.916	1	9.28813	1.5	0.139322	100	15.4802	0.232203
2023-08-28	3	AH	Ladder bay	3	10	7	Bluehead	T. bifasciatum	5-10	23	7.5	0.0107	2.916	1	87.6577	1.5	1.31487	38.3333	146.096	2.19144
2023-08-28	3	AH	Ladder bay	3	10	7	Bluehead	T. bifasciatum	10-15	4	12.5	0.0107	2.916	1	67.6135	1.5	1.0142	6.66667	112.689	1.69034
2023-08-28	3	AH	Torrens point	3	10	8	Smooth trunkfish	L. triqueter	5-10	1	7.5	0.309	2.23	1	27.6277	2.3	0.635438	1.66667	46.0462	1.05906
2023-08-28	3	AH	Torrens point	3	10	8	Yellowhead wrasse	H. garnoti	5-10	6	7.5	0.00519	3.375	1	27.9673	3	0.839019	10	46.6121	1.39836
2023-08-28	3	AH	Torrens point	3	10	8	Yellowhead wrasse	H. garnoti	15-20	1	17.5	0.00519	3.375	1	81.3618	3	2.44086	1.66667	135.603	4.06809
2023-08-28	3	AH	Torrens point	3	10	8	Yellowhead wrasse	H. garnoti	20-25	1	22.5	0.00519	3.375	1	190.013	3	5.70039	1.66667	316.688	9.50065
2023-08-28	3	AH	Torrens point	3	10	8	Bluehead	T. bifasciatum	0-5	75	2.5	0.0107	2.916	1	11.6102	1.5	0.174152	125	19.3503	0.290254
2023-08-28	3	AH	Torrens point	3	10	8	Bluehead	T. bifasciatum	5-10	55	7.5	0.0107	2.916	1	209.616	1.5	3.14424	91.6667	349.361	5.24041
2023-08-28	3	AH	Torrens point	1	10	8	Yellowhead wrasse	H. garnoti	5-10	2	7.5	0.00519	3.375	1	9.32243	3	0.279673	3.33333	15.5374	0.466121
2023-08-28	3	AH	Torrens point	1	10	8	Bluehead	T. bifasciatum	5-10	13	7.5	0.0107	2.916	1	49.5457	1.5	0.743185	21.6667	82.5761	1.23864
2023-08-28	3	AH	Torrens point	1	10	8	Bluehead	T. bifasciatum	0-5	95	2.5	0.0107	2.916	1	14.7062	1.5	0.220593	158.333	24.5103	0.367655
2023-08-28	3	AH	Torrens point	2	10	10	Puddingwife	H. radiatus	35-40	1	37.5	0.0131	3.038	1	792.827	19.9	157.773	1.66667	1321.38	262.954
2023-08-28	3	AH	Torrens point	2	10	10	Bluehead	T. bifasciatum	0-5	120	2.5	0.0107	2.916	1	18.5763	1.5	0.278644	200	30.9604	0.464406
2023-08-28	3	AH	Torrens point	2	10	10	Bluehead	T. bifasciatum	5-10	20	7.5	0.0107	2.916	1	76.2241	1.5	1.14336	33.3333	127.04	1.9056
2023-08-28	3	AH	Torrens point	2	10	10	Bluehead	T. bifasciatum	10-15	1	12.5	0.0107	2.916	1	16.9034	1.5	0.253551	1.66667	28.1723	0.422584
2023-08-28	3	AH	Torrens point	2	10	10	Caesar grunt	H. carbonarium	30-35	1	32.5	0.0404	2.74	0.929368	458.961	10.9	50.0268	1.66667	764.936	83.378
2023-08-28	3	AH	Torrens point	2	10	10	French grunt	H. flavolineatum	20-25	1	22.5	0.017	3.05	0.917431	173.962	1.5	2.60943	1.66667	289.937	4.34905
2023-09-26	3	AH	Diadema city	1	15	8.4-7.5	Bluehead	T. bifasciatum	0-5	28	2.5	0.0107	2.916	1	4.33446	1.5	0.0650169	46.6667	7.2241	0.108361
2023-09-26	3	AH	Diadema city	1	15	8.4-7.5	Bluehead	T. bifasciatum	5-10	6	7.5	0.0107	2.916	1	22.8672	1.5	0.343009	10	38.1121	0.571681
2023-09-26	3	AH	Diadema city	1	15	8.4-7.5	French grunt	H. flavolineatum	15-20	4	17.5	0.017	3.05	0.917431	323.314	1.5	4.84971	6.66667	538.856	8.08284
2023-09-26	3	AH	Diadema city	2	15	7.5-7.4	Yellowhead wrasse	H. garnoti	0-5	1	2.5	0.00519	3.375	1	0.114344	3	0.00343033	1.66667	0.190574	0.00571722
2023-09-26	3	AH	Diadema city	2	15	7.5-7.4	Bluehead	T. bifasciatum	0-5	105	2.5	0.0107	2.916	1	16.2542	1.5	0.243813	175	27.0904	0.406356
2023-09-26	3	AH	Diadema city	2	15	7.5-7.4	Bluehead	T. bifasciatum	5-10	15	7.5	0.0107	2.916	1	57.1681	1.5	0.857521	25	95.2801	1.4292
2023-09-26	3	AH	Diadema city	3	15	7.4-6.4	Yellowhead wrasse	H. garnoti	0-5	2	2.5	0.00519	3.375	1	0.228689	3	0.00686066	3.33333	0.381148	0.0114344
2023-09-26	3	AH	Diadema city	3	15	7.4-6.4	Yellowhead wrasse	H. garnoti	5-10	5	7.5	0.00519	3.375	1	23.3061	3	0.699182	8.33333	38.8435	1.1653
2023-09-26	3	AH	Diadema city	3	15	7.4-6.4	Yellowhead wrasse	H. garnoti	10-15	2	12.5	0.00519	3.375	1	52.2719	3	1.56816	3.33333	87.1199	2.6136
2023-09-26	3	AH	Diadema city	3	15	7.4-6.4	Bluehead	T. bifasciatum	0-5	55	2.5	0.0107	2.916	1	8.51412	1.5	0.127712	91.6667	14.1902	0.212853
2023-09-26	3	AH	Diadema city	3	15	7.4-6.4	Bluehead	T. bifasciatum	5-10	1	7.5	0.0107	2.916	1	3.81121	1.5	0.0571681	1.66667	6.35201	0.0952801
2023-09-26	3	AH	Diadema city	3	15	7.4-6.4	Bluehead	T. bifasciatum	10-15	1	12.5	0.0107	2.916	1	16.9034	1.5	0.253551	1.66667	28.1723	0.422584
2023-09-26	3	AH	Tent reef	1	10	4.9-6.8	Yellowhead wrasse	H. garnoti	5-10	2	7.5	0.00519	3.375	1	9.32243	3	0.279673	3.33333	15.5374	0.466121
2023-09-26	3	AH	Tent reef	1	10	4.9-6.8	Bluehead	T. bifasciatum	0-5	125	2.5	0.0107	2.916	1	19.3503	1.5	0.290254	208.333	32.2504	0.483757
2023-09-26	3	AH	Tent reef	1	10	4.9-6.8	Bluehead	T. bifasciatum	5-10	52	7.5	0.0107	2.916	1	198.183	1.5	2.97274	86.6667	330.305	4.95457
2023-09-26	3	AH	Tent reef	1	10	4.9-6.8	Bluehead	T. bifasciatum	10-15	2	12.5	0.0107	2.916	1	33.8067	1.5	0.507101	3.33333	56.3446	0.845169
2023-09-26	3	AH	Tent reef	2	10	6.8-6.0	Bluehead	T. bifasciatum	0-5	128	2.5	0.0107	2.916	1	19.8147	1.5	0.29722	213.333	33.0244	0.495367
2023-09-26	3	AH	Tent reef	2	10	6.8-6.0	Bluehead	T. bifasciatum	5-10	70	7.5	0.0107	2.916	1	266.784	1.5	4.00177	116.667	444.641	6.66961
2023-09-26	3	AH	Tent reef	3	10	6.0-5.2	Smooth trunkfish	L. triqueter	15-20	1	17.5	0.309	2.23	1	182.782	2.3	4.20399	1.66667	304.637	7.00664
2023-09-26	3	AH	Tent reef	3	10	6.0-5.2	Spanish hogfish	B. rufus	15-20	2	17.5	0.0144	3.053	1	179.634	14.4	25.8672	3.33333	299.389	43.1121
2023-09-26	3	AH	Tent reef	3	10	6.0-5.2	Bluehead	T. bifasciatum	0-5	120	2.5	0.0107	2.916	1	18.5763	1.5	0.278644	200	30.9604	0.464406
2023-09-26	3	AH	Tent reef	3	10	6.0-5.2	Bluehead	T. bifasciatum	5-10	40	7.5	0.0107	2.916	1	152.448	1.5	2.28672	66.6667	254.08	3.81121
2023-09-26	3	AH	Tent reef	3	10	6.0-5.2	Bluehead	T. bifasciatum	10-15	1	12.5	0.0107	2.916	1	16.9034	1.5	0.253551	1.66667	28.1723	0.422584
2023-09-26	3	AH	Tent reef	3	10	6.0-5.2	Bluehead	T. bifasciatum	15-20	2	17.5	0.0107	2.916	1	90.1805	1.5	1.35271	3.33333	150.301	2.25451

## Sheet: Fish per species per 100 m2
Common_name	Location	Survey	Transect	Number	Biomass	Predation_pressure
Spanish hogfish	Diadema city	1	1	0	0	0
Yellowhead wrasse	Diadema city	1	1	38.3333	47.7526	1.43258
Bluehead	Diadema city	1	1	100	15.4802	0.232203
Black Margate	Diadema city	1	1	0	0	0
Caesar grunt	Diadema city	1	1	0	0	0
Blackear wrasse	Diadema city	1	1	0	0	0
Sharpnose puffer	Diadema city	1	1	0	0	0
French grunt	Diadema city	1	1	15	1125.99	16.8898
Puddingwife	Diadema city	1	1	0	0	0
Spotted trunkfish	Diadema city	1	1	0	0	0
Bandtail puffer	Diadema city	1	1	0	0	0
Smooth trunkfish	Diadema city	1	1	0	0	0
Honeycomb cowfish	Diadema city	1	1	0	0	0
Spanish hogfish	Diadema city	1	2	0	0	0
Yellowhead wrasse	Diadema city	1	2	0	0	0
Bluehead	Diadema city	1	2	15	26.6981	0.400471
Black Margate	Diadema city	1	2	0	0	0
Caesar grunt	Diadema city	1	2	0	0	0
Blackear wrasse	Diadema city	1	2	0	0	0
Sharpnose puffer	Diadema city	1	2	0	0	0
French grunt	Diadema city	1	2	3.33333	182.989	2.74484
Puddingwife	Diadema city	1	2	0	0	0
Spotted trunkfish	Diadema city	1	2	0	0	0
Bandtail puffer	Diadema city	1	2	0	0	0
Smooth trunkfish	Diadema city	1	2	0	0	0
Honeycomb cowfish	Diadema city	1	2	0	0	0
Spanish hogfish	Diadema city	1	3	0	0	0
Yellowhead wrasse	Diadema city	1	3	20	2.28689	0.0686066
Bluehead	Diadema city	1	3	186.667	41.0844	0.616266
Black Margate	Diadema city	1	3	0	0	0
Caesar grunt	Diadema city	1	3	1.66667	483.99	52.7549
Blackear wrasse	Diadema city	1	3	0	0	0
Sharpnose puffer	Diadema city	1	3	0	0	0
French grunt	Diadema city	1	3	1.66667	289.937	4.34905
Puddingwife	Diadema city	1	3	0	0	0
Spotted trunkfish	Diadema city	1	3	0	0	0
Bandtail puffer	Diadema city	1	3	0	0	0
Smooth trunkfish	Diadema city	1	3	0	0	0
Honeycomb cowfish	Diadema city	1	3	0	0	0
Spanish hogfish	Diadema city	2	1	0	0	0
Yellowhead wrasse	Diadema city	2	1	11.6667	39.2246	1.17674
Bluehead	Diadema city	2	1	58.3333	9.03012	0.135452
Black Margate	Diadema city	2	1	0	0	0
Caesar grunt	Diadema city	2	1	1.66667	483.99	52.7549
Blackear wrasse	Diadema city	2	1	0	0	0
Sharpnose puffer	Diadema city	2	1	0	0	0
French grunt	Diadema city	2	1	6.66667	765.966	11.4895
Puddingwife	Diadema city	2	1	0	0	0
Spotted trunkfish	Diadema city	2	1	0	0	0
Bandtail puffer	Diadema city	2	1	0	0	0
Smooth trunkfish	Diadema city	2	1	0	0	0
Honeycomb cowfish	Diadema city	2	1	0	0	0
Spanish hogfish	Diadema city	2	2	0	0	0
Yellowhead wrasse	Diadema city	2	2	3.33333	0.381148	0.0114344
Bluehead	Diadema city	2	2	116.667	18.0602	0.270904
Black Margate	Diadema city	2	2	0	0	0
Caesar grunt	Diadema city	2	2	0	0	0
Blackear wrasse	Diadema city	2	2	0	0	0
Sharpnose puffer	Diadema city	2	2	0	0	0
French grunt	Diadema city	2	2	8.33333	587.131	8.80697
Puddingwife	Diadema city	2	2	0	0	0
Spotted trunkfish	Diadema city	2	2	0	0	0
Bandtail puffer	Diadema city	2	2	0	0	0
Smooth trunkfish	Diadema city	2	2	0	0	0
Honeycomb cowfish	Diadema city	2	2	0	0	0
Spanish hogfish	Diadema city	2	3	0	0	0
Yellowhead wrasse	Diadema city	2	3	16.6667	218.753	6.56258
Bluehead	Diadema city	2	3	160	83.1527	1.24729
Black Margate	Diadema city	2	3	0	0	0
Caesar grunt	Diadema city	2	3	1.66667	279.283	30.4419
Blackear wrasse	Diadema city	2	3	1.66667	123.537	8.40055
Sharpnose puffer	Diadema city	2	3	0	0	0
French grunt	Diadema city	2	3	3.33333	424.651	6.36976
Puddingwife	Diadema city	2	3	1.66667	9.94389	1.97883
Spotted trunkfish	Diadema city	2	3	0	0	0
Bandtail puffer	Diadema city	2	3	0	0	0
Smooth trunkfish	Diadema city	2	3	1.66667	46.0462	1.05906
Honeycomb cowfish	Diadema city	2	3	0	0	0
Spanish hogfish	Diadema city	3	1	0	0	0
Yellowhead wrasse	Diadema city	3	1	0	0	0
Bluehead	Diadema city	3	1	56.6667	45.3362	0.680042
Black Margate	Diadema city	3	1	0	0	0
Caesar grunt	Diadema city	3	1	0	0	0
Blackear wrasse	Diadema city	3	1	0	0	0
Sharpnose puffer	Diadema city	3	1	0	0	0
French grunt	Diadema city	3	1	6.66667	538.856	8.08284
Puddingwife	Diadema city	3	1	0	0	0
Spotted trunkfish	Diadema city	3	1	0	0	0
Bandtail puffer	Diadema city	3	1	0	0	0
Smooth trunkfish	Diadema city	3	1	0	0	0
Honeycomb cowfish	Diadema city	3	1	0	0	0
Spanish hogfish	Diadema city	3	2	0	0	0
Yellowhead wrasse	Diadema city	3	2	1.66667	0.190574	0.00571722
Bluehead	Diadema city	3	2	200	122.371	1.83556
Black Margate	Diadema city	3	2	0	0	0
Caesar grunt	Diadema city	3	2	0	0	0
Blackear wrasse	Diadema city	3	2	0	0	0
Sharpnose puffer	Diadema city	3	2	0	0	0
French grunt	Diadema city	3	2	0	0	0
Puddingwife	Diadema city	3	2	0	0	0
Spotted trunkfish	Diadema city	3	2	0	0	0
Bandtail puffer	Diadema city	3	2	0	0	0
Smooth trunkfish	Diadema city	3	2	0	0	0
Honeycomb cowfish	Diadema city	3	2	0	0	0
Spanish hogfish	Diadema city	3	3	0	0	0
Yellowhead wrasse	Diadema city	3	3	15	126.345	3.79034
Bluehead	Diadema city	3	3	95	48.7145	0.730717
Black Margate	Diadema city	3	3	0	0	0
Caesar grunt	Diadema city	3	3	0	0	0
Blackear wrasse	Diadema city	3	3	0	0	0
Sharpnose puffer	Diadema city	3	3	0	0	0
French grunt	Diadema city	3	3	0	0	0
Puddingwife	Diadema city	3	3	0	0	0
Spotted trunkfish	Diadema city	3	3	0	0	0
Bandtail puffer	Diadema city	3	3	0	0	0
Smooth trunkfish	Diadema city	3	3	0	0	0
Honeycomb cowfish	Diadema city	3	3	0	0	0
Spanish hogfish	Tent reef	1	1	1.66667	322.422	46.4287
Yellowhead wrasse	Tent reef	1	1	286.667	32.7787	0.983362
Bluehead	Tent reef	1	1	16.6667	63.5201	0.952801
Black Margate	Tent reef	1	1	0	0	0
Caesar grunt	Tent reef	1	1	0	0	0
Blackear wrasse	Tent reef	1	1	0	0	0
Sharpnose puffer	Tent reef	1	1	0	0	0
French grunt	Tent reef	1	1	0	0	0
Puddingwife	Tent reef	1	1	0	0	0
Spotted trunkfish	Tent reef	1	1	0	0	0
Bandtail puffer	Tent reef	1	1	0	0	0
Smooth trunkfish	Tent reef	1	1	0	0	0
Honeycomb cowfish	Tent reef	1	1	0	0	0
Spanish hogfish	Tent reef	1	2	5	1067.09	153.66
Yellowhead wrasse	Tent reef	1	2	3.33333	15.5374	0.466121
Bluehead	Tent reef	1	2	721.667	434.698	6.52047
Black Margate	Tent reef	1	2	0	0	0
Caesar grunt	Tent reef	1	2	0	0	0
Blackear wrasse	Tent reef	1	2	0	0	0
Sharpnose puffer	Tent reef	1	2	0	0	0
French grunt	Tent reef	1	2	0	0	0
Puddingwife	Tent reef	1	2	0	0	0
Spotted trunkfish	Tent reef	1	2	0	0	0
Bandtail puffer	Tent reef	1	2	0	0	0
Smooth trunkfish	Tent reef	1	2	0	0	0
Honeycomb cowfish	Tent reef	1	2	0	0	0
Spanish hogfish	Tent reef	1	3	0	0	0
Yellowhead wrasse	Tent reef	1	3	5	0.571722	0.0171517
Bluehead	Tent reef	1	3	595	439.466	6.59198
Black Margate	Tent reef	1	3	0	0	0
Caesar grunt	Tent reef	1	3	0	0	0
Blackear wrasse	Tent reef	1	3	0	0	0
Sharpnose puffer	Tent reef	1	3	0	0	0
French grunt	Tent reef	1	3	0	0	0
Puddingwife	Tent reef	1	3	1.66667	855.503	170.245
Spotted trunkfish	Tent reef	1	3	0	0	0
Bandtail puffer	Tent reef	1	3	0	0	0
Smooth trunkfish	Tent reef	1	3	0	0	0
Honeycomb cowfish	Tent reef	1	3	0	0	0
Spanish hogfish	Tent reef	2	1	0	0	0
Yellowhead wrasse	Tent reef	2	1	33.3333	155.374	4.66121
Bluehead	Tent reef	2	1	736.667	2607.47	39.112
Black Margate	Tent reef	2	1	0	0	0
Caesar grunt	Tent reef	2	1	0	0	0
Blackear wrasse	Tent reef	2	1	0	0	0
Sharpnose puffer	Tent reef	2	1	0	0	0
French grunt	Tent reef	2	1	0	0	0
Puddingwife	Tent reef	2	1	0	0	0
Spotted trunkfish	Tent reef	2	1	0	0	0
Bandtail puffer	Tent reef	2	1	1.66667	0.631259	0.0435569
Smooth trunkfish	Tent reef	2	1	1.66667	143.852	3.3086
Honeycomb cowfish	Tent reef	2	1	0	0	0
Spanish hogfish	Tent reef	2	2	6.66667	2379.87	342.702
Yellowhead wrasse	Tent reef	2	2	0	0	0
Bluehead	Tent reef	2	2	306.667	1172.31	17.5846
Black Margate	Tent reef	2	2	0	0	0
Caesar grunt	Tent reef	2	2	0	0	0
Blackear wrasse	Tent reef	2	2	0	0	0
Sharpnose puffer	Tent reef	2	2	0	0	0
French grunt	Tent reef	2	2	0	0	0
Puddingwife	Tent reef	2	2	0	0	0
Spotted trunkfish	Tent reef	2	2	0	0	0
Bandtail puffer	Tent reef	2	2	0	0	0
Smooth trunkfish	Tent reef	2	2	3.33333	350.683	8.0657
Honeycomb cowfish	Tent reef	2	2	0	0	0
Spanish hogfish	Tent reef	2	3	3.33333	1189.94	171.351
Yellowhead wrasse	Tent reef	2	3	0	0	0
Bluehead	Tent reef	2	3	771.667	2153.28	32.2992
Black Margate	Tent reef	2	3	0	0	0
Caesar grunt	Tent reef	2	3	0	0	0
Blackear wrasse	Tent reef	2	3	0	0	0
Sharpnose puffer	Tent reef	2	3	0	0	0
French grunt	Tent reef	2	3	0	0	0
Puddingwife	Tent reef	2	3	0	0	0
Spotted trunkfish	Tent reef	2	3	0	0	0
Bandtail puffer	Tent reef	2	3	0	0	0
Smooth trunkfish	Tent reef	2	3	0	0	0
Honeycomb cowfish	Tent reef	2	3	1.66667	562.996	0
Spanish hogfish	Tent reef	3	1	0	0	0
Yellowhead wrasse	Tent reef	3	1	3.33333	15.5374	0.466121
Bluehead	Tent reef	3	1	298.333	418.9	6.28349
Black Margate	Tent reef	3	1	0	0	0
Caesar grunt	Tent reef	3	1	0	0	0
Blackear wrasse	Tent reef	3	1	0	0	0
Sharpnose puffer	Tent reef	3	1	0	0	0
French grunt	Tent reef	3	1	0	0	0
Puddingwife	Tent reef	3	1	0	0	0
Spotted trunkfish	Tent reef	3	1	0	0	0
Bandtail puffer	Tent reef	3	1	0	0	0
Smooth trunkfish	Tent reef	3	1	0	0	0
Honeycomb cowfish	Tent reef	3	1	0	0	0
Spanish hogfish	Tent reef	3	2	0	0	0
Yellowhead wrasse	Tent reef	3	2	0	0	0
Bluehead	Tent reef	3	2	330	477.665	7.16498
Black Margate	Tent reef	3	2	0	0	0
Caesar grunt	Tent reef	3	2	0	0	0
Blackear wrasse	Tent reef	3	2	0	0	0
Sharpnose puffer	Tent reef	3	2	0	0	0
French grunt	Tent reef	3	2	0	0	0
Puddingwife	Tent reef	3	2	0	0	0
Spotted trunkfish	Tent reef	3	2	0	0	0
Bandtail puffer	Tent reef	3	2	0	0	0
Smooth trunkfish	Tent reef	3	2	0	0	0
Honeycomb cowfish	Tent reef	3	2	0	0	0
Spanish hogfish	Tent reef	3	3	3.33333	299.389	43.1121
Yellowhead wrasse	Tent reef	3	3	0	0	0
Bluehead	Tent reef	3	3	271.667	463.514	6.95271
Black Margate	Tent reef	3	3	0	0	0
Caesar grunt	Tent reef	3	3	0	0	0
Blackear wrasse	Tent reef	3	3	0	0	0
Sharpnose puffer	Tent reef	3	3	0	0	0
French grunt	Tent reef	3	3	0	0	0
Puddingwife	Tent reef	3	3	0	0	0
Spotted trunkfish	Tent reef	3	3	0	0	0
Bandtail puffer	Tent reef	3	3	0	0	0
Smooth trunkfish	Tent reef	3	3	1.66667	304.637	7.00664
Honeycomb cowfish	Tent reef	3	3	0	0	0
Spanish hogfish	Ladder bay	1	1	0.0666667	13.8951	2.00089
Yellowhead wrasse	Ladder bay	1	1	0.0166667	0.4356	0.013068
Bluehead	Ladder bay	1	1	91.6667	87.3183	1.30977
Black Margate	Ladder bay	1	1	1.66667	7.82677	4.18732
Caesar grunt	Ladder bay	1	1	3.33333	419.561	45.7321
Blackear wrasse	Ladder bay	1	1	0	0	0
Sharpnose puffer	Ladder bay	1	1	0	0	0
French grunt	Ladder bay	1	1	0	0	0
Puddingwife	Ladder bay	1	1	0	0	0
Spotted trunkfish	Ladder bay	1	1	0	0	0
Bandtail puffer	Ladder bay	1	1	0	0	0
Smooth trunkfish	Ladder bay	1	1	0	0	0
Honeycomb cowfish	Ladder bay	1	1	0	0	0
Spanish hogfish	Ladder bay	1	2	1.66667	322.422	46.4287
Yellowhead wrasse	Ladder bay	1	2	0	0	0
Bluehead	Ladder bay	1	2	145	180.89	2.71336
Black Margate	Ladder bay	1	2	3.33333	1354.24	724.517
Caesar grunt	Ladder bay	1	2	3.33333	967.979	105.51
Blackear wrasse	Ladder bay	1	2	0	0	0
Sharpnose puffer	Ladder bay	1	2	0	0	0
French grunt	Ladder bay	1	2	0	0	0
Puddingwife	Ladder bay	1	2	0	0	0
Spotted trunkfish	Ladder bay	1	2	0	0	0
Bandtail puffer	Ladder bay	1	2	0	0	0
Smooth trunkfish	Ladder bay	1	2	0	0	0
Honeycomb cowfish	Ladder bay	1	2	0	0	0
Spanish hogfish	Ladder bay	1	3	0	0	0
Yellowhead wrasse	Ladder bay	1	3	10	404.38	12.1314
Bluehead	Ladder bay	1	3	140	289.809	4.34713
Black Margate	Ladder bay	1	3	0	0	0
Caesar grunt	Ladder bay	1	3	1.66667	483.99	52.7549
Blackear wrasse	Ladder bay	1	3	0	0	0
Sharpnose puffer	Ladder bay	1	3	0	0	0
French grunt	Ladder bay	1	3	0	0	0
Puddingwife	Ladder bay	1	3	0	0	0
Spotted trunkfish	Ladder bay	1	3	0	0	0
Bandtail puffer	Ladder bay	1	3	0	0	0
Smooth trunkfish	Ladder bay	1	3	0	0	0
Honeycomb cowfish	Ladder bay	1	3	0	0	0
Spanish hogfish	Ladder bay	2	1	3.33333	472.117	67.9848
Yellowhead wrasse	Ladder bay	2	1	1.66667	0.190574	0.00571722
Bluehead	Ladder bay	2	1	173.333	160.901	2.41351
Black Margate	Ladder bay	2	1	0	0	0
Caesar grunt	Ladder bay	2	1	0	0	0
Blackear wrasse	Ladder bay	2	1	0	0	0
Sharpnose puffer	Ladder bay	2	1	0	0	0
French grunt	Ladder bay	2	1	0	0	0
Puddingwife	Ladder bay	2	1	0	0	0
Spotted trunkfish	Ladder bay	2	1	0	0	0
Bandtail puffer	Ladder bay	2	1	0	0	0
Smooth trunkfish	Ladder bay	2	1	0	0	0
Honeycomb cowfish	Ladder bay	2	1	0	0	0
Spanish hogfish	Ladder bay	2	2	0	0	0
Yellowhead wrasse	Ladder bay	2	2	45	254.23	7.62689
Bluehead	Ladder bay	2	2	138.333	152.927	2.2939
Black Margate	Ladder bay	2	2	0	0	0
Caesar grunt	Ladder bay	2	2	0	0	0
Blackear wrasse	Ladder bay	2	2	0	0	0
Sharpnose puffer	Ladder bay	2	2	0	0	0
French grunt	Ladder bay	2	2	0	0	0
Puddingwife	Ladder bay	2	2	0	0	0
Spotted trunkfish	Ladder bay	2	2	1.66667	96.0286	9.60286
Bandtail puffer	Ladder bay	2	2	0	0	0
Smooth trunkfish	Ladder bay	2	2	0	0	0
Honeycomb cowfish	Ladder bay	2	2	0	0	0
Spanish hogfish	Ladder bay	2	3	0	0	0
Yellowhead wrasse	Ladder bay	2	3	5	0.571722	0.0171517
Bluehead	Ladder bay	2	3	285	264.485	3.96728
Black Margate	Ladder bay	2	3	0	0	0
Caesar grunt	Ladder bay	2	3	0	0	0
Blackear wrasse	Ladder bay	2	3	0	0	0
Sharpnose puffer	Ladder bay	2	3	0	0	0
French grunt	Ladder bay	2	3	0	0	0
Puddingwife	Ladder bay	2	3	0	0	0
Spotted trunkfish	Ladder bay	2	3	0	0	0
Bandtail puffer	Ladder bay	2	3	0	0	0
Smooth trunkfish	Ladder bay	2	3	0	0	0
Honeycomb cowfish	Ladder bay	2	3	0	0	0
Spanish hogfish	Ladder bay	3	1	0	0	0
Yellowhead wrasse	Ladder bay	3	1	21.6667	407.784	12.2335
Bluehead	Ladder bay	3	1	236.667	917.702	13.7655
Black Margate	Ladder bay	3	1	0	0	0
Caesar grunt	Ladder bay	3	1	0	0	0
Blackear wrasse	Ladder bay	3	1	0	0	0
Sharpnose puffer	Ladder bay	3	1	0	0	0
French grunt	Ladder bay	3	1	0	0	0
Puddingwife	Ladder bay	3	1	0	0	0
Spotted trunkfish	Ladder bay	3	1	0	0	0
Bandtail puffer	Ladder bay	3	1	0	0	0
Smooth trunkfish	Ladder bay	3	1	0	0	0
Honeycomb cowfish	Ladder bay	3	1	0	0	0
Spanish hogfish	Ladder bay	3	2	1.66667	322.422	46.4287
Yellowhead wrasse	Ladder bay	3	2	5	495.851	14.8755
Bluehead	Ladder bay	3	2	235	673.693	10.1054
Black Margate	Ladder bay	3	2	0	0	0
Caesar grunt	Ladder bay	3	2	0	0	0
Blackear wrasse	Ladder bay	3	2	1.66667	9.0872	0.61793
Sharpnose puffer	Ladder bay	3	2	0	0	0
French grunt	Ladder bay	3	2	0	0	0
Puddingwife	Ladder bay	3	2	1.66667	46.9389	9.34084
Spotted trunkfish	Ladder bay	3	2	0	0	0
Bandtail puffer	Ladder bay	3	2	0	0	0
Smooth trunkfish	Ladder bay	3	2	0	0	0
Honeycomb cowfish	Ladder bay	3	2	0	0	0
Spanish hogfish	Ladder bay	3	3	0	0	0
Yellowhead wrasse	Ladder bay	3	3	18.3333	394.375	11.8313
Bluehead	Ladder bay	3	3	145	274.266	4.11398
Black Margate	Ladder bay	3	3	0	0	0
Caesar grunt	Ladder bay	3	3	0	0	0
Blackear wrasse	Ladder bay	3	3	0	0	0
Sharpnose puffer	Ladder bay	3	3	0	0	0
French grunt	Ladder bay	3	3	0	0	0
Puddingwife	Ladder bay	3	3	0	0	0
Spotted trunkfish	Ladder bay	3	3	0	0	0
Bandtail puffer	Ladder bay	3	3	0	0	0
Smooth trunkfish	Ladder bay	3	3	0	0	0
Honeycomb cowfish	Ladder bay	3	3	0	0	0
Spanish hogfish	Torrens point	1	1	0	0	0
Yellowhead wrasse	Torrens point	1	1	6.66667	31.0748	0.932243
Bluehead	Torrens point	1	1	221.667	157.177	2.35766
Black Margate	Torrens point	1	1	0	0	0
Caesar grunt	Torrens point	1	1	5	1451.97	158.265
Blackear wrasse	Torrens point	1	1	0	0	0
Sharpnose puffer	Torrens point	1	1	0	0	0
French grunt	Torrens point	1	1	0	0	0
Puddingwife	Torrens point	1	1	0	0	0
Spotted trunkfish	Torrens point	1	1	0	0	0
Bandtail puffer	Torrens point	1	1	0	0	0
Smooth trunkfish	Torrens point	1	1	0	0	0
Honeycomb cowfish	Torrens point	1	1	0	0	0
Spanish hogfish	Torrens point	1	2	0	0	0
Yellowhead wrasse	Torrens point	1	2	8.33333	38.8435	1.1653
Bluehead	Torrens point	1	2	176.667	85.7327	1.28599
Black Margate	Torrens point	1	2	0	0	0
Caesar grunt	Torrens point	1	2	1.66667	483.99	52.7549
Blackear wrasse	Torrens point	1	2	0	0	0
Sharpnose puffer	Torrens point	1	2	1.66667	18.7167	0.711235
French grunt	Torrens point	1	2	10	877.068	13.156
Puddingwife	Torrens point	1	2	0	0	0
Spotted trunkfish	Torrens point	1	2	0	0	0
Bandtail puffer	Torrens point	1	2	0	0	0
Smooth trunkfish	Torrens point	1	2	0	0	0
Honeycomb cowfish	Torrens point	1	2	0	0	0
Spanish hogfish	Torrens point	1	3	1.66667	53.5892	7.71685
Yellowhead wrasse	Torrens point	1	3	73.3333	38.6977	1.16093
Bluehead	Torrens point	1	3	163.333	156.797	2.35195
Black Margate	Torrens point	1	3	0	0	0
Caesar grunt	Torrens point	1	3	0	0	0
Blackear wrasse	Torrens point	1	3	1.66667	9.0872	0.61793
Sharpnose puffer	Torrens point	1	3	0	0	0
French grunt	Torrens point	1	3	0	0	0
Puddingwife	Torrens point	1	3	0	0	0
Spotted trunkfish	Torrens point	1	3	0	0	0
Bandtail puffer	Torrens point	1	3	0	0	0
Smooth trunkfish	Torrens point	1	3	0	0	0
Honeycomb cowfish	Torrens point	1	3	0	0	0
Spanish hogfish	Torrens point	2	1	0	0	0
Yellowhead wrasse	Torrens point	2	1	6.66667	8.34041	0.250212
Bluehead	Torrens point	2	1	275	194.921	2.92381
Black Margate	Torrens point	2	1	0	0	0
Caesar grunt	Torrens point	2	1	0	0	0
Blackear wrasse	Torrens point	2	1	0	0	0
Sharpnose puffer	Torrens point	2	1	0	0	0
French grunt	Torrens point	2	1	0	0	0
Puddingwife	Torrens point	2	1	0	0	0
Spotted trunkfish	Torrens point	2	1	0	0	0
Bandtail puffer	Torrens point	2	1	0	0	0
Smooth trunkfish	Torrens point	2	1	0	0	0
Honeycomb cowfish	Torrens point	2	1	0	0	0
Spanish hogfish	Torrens point	2	2	1.66667	149.695	21.556
Yellowhead wrasse	Torrens point	2	2	8.33333	23.6872	0.710617
Bluehead	Torrens point	2	2	368.333	84.9331	1.274
Black Margate	Torrens point	2	2	0	0	0
Caesar grunt	Torrens point	2	2	0	0	0
Blackear wrasse	Torrens point	2	2	0	0	0
Sharpnose puffer	Torrens point	2	2	0	0	0
French grunt	Torrens point	2	2	0	0	0
Puddingwife	Torrens point	2	2	0	0	0
Spotted trunkfish	Torrens point	2	2	0	0	0
Bandtail puffer	Torrens point	2	2	0	0	0
Smooth trunkfish	Torrens point	2	2	0	0	0
Honeycomb cowfish	Torrens point	2	2	0	0	0
Spanish hogfish	Torrens point	2	3	0	0	0
Yellowhead wrasse	Torrens point	2	3	6.66667	23.4966	0.704899
Bluehead	Torrens point	2	3	266.667	41.2806	0.619208
Black Margate	Torrens point	2	3	1.66667	500.324	267.673
Caesar grunt	Torrens point	2	3	20	3351.4	365.302
Blackear wrasse	Torrens point	2	3	0	0	0
Sharpnose puffer	Torrens point	2	3	0	0	0
French grunt	Torrens point	2	3	1.66667	134.714	2.02071
Puddingwife	Torrens point	2	3	0	0	0
Spotted trunkfish	Torrens point	2	3	0	0	0
Bandtail puffer	Torrens point	2	3	0	0	0
Smooth trunkfish	Torrens point	2	3	0	0	0
Honeycomb cowfish	Torrens point	2	3	0	0	0
Spanish hogfish	Torrens point	3	1	0	0	0
Yellowhead wrasse	Torrens point	3	1	3.33333	15.5374	0.466121
Bluehead	Torrens point	3	1	180	107.086	1.6063
Black Margate	Torrens point	3	1	0	0	0
Caesar grunt	Torrens point	3	1	0	0	0
Blackear wrasse	Torrens point	3	1	0	0	0
Sharpnose puffer	Torrens point	3	1	0	0	0
French grunt	Torrens point	3	1	0	0	0
Puddingwife	Torrens point	3	1	0	0	0
Spotted trunkfish	Torrens point	3	1	0	0	0
Bandtail puffer	Torrens point	3	1	0	0	0
Smooth trunkfish	Torrens point	3	1	0	0	0
Honeycomb cowfish	Torrens point	3	1	0	0	0
Spanish hogfish	Torrens point	3	2	0	0	0
Yellowhead wrasse	Torrens point	3	2	0	0	0
Bluehead	Torrens point	3	2	235	186.173	2.79259
Black Margate	Torrens point	3	2	0	0	0
Caesar grunt	Torrens point	3	2	1.66667	764.936	83.378
Blackear wrasse	Torrens point	3	2	0	0	0
Sharpnose puffer	Torrens point	3	2	0	0	0
French grunt	Torrens point	3	2	1.66667	289.937	4.34905
Puddingwife	Torrens point	3	2	1.66667	1321.38	262.954
Spotted trunkfish	Torrens point	3	2	0	0	0
Bandtail puffer	Torrens point	3	2	0	0	0
Smooth trunkfish	Torrens point	3	2	0	0	0
Honeycomb cowfish	Torrens point	3	2	0	0	0
Spanish hogfish	Torrens point	3	3	0	0	0
Yellowhead wrasse	Torrens point	3	3	13.3333	498.904	14.9671
Bluehead	Torrens point	3	3	216.667	368.711	5.53066
Black Margate	Torrens point	3	3	0	0	0
Caesar grunt	Torrens point	3	3	0	0	0
Blackear wrasse	Torrens point	3	3	0	0	0
Sharpnose puffer	Torrens point	3	3	0	0	0
French grunt	Torrens point	3	3	0	0	0
Puddingwife	Torrens point	3	3	0	0	0
Spotted trunkfish	Torrens point	3	3	0	0	0
Bandtail puffer	Torrens point	3	3	0	0	0
Smooth trunkfish	Torrens point	3	3	1.66667	46.0462	1.05906
Honeycomb cowfish	Torrens point	3	3	0	0	0
	Torrens point	3	3	1.66667	46.0462	1.05906

## Sheet: Fish total per 100m2
Location	Survey	Transect	Number	Biomass	Predation_pressure
Ladder bay	1	1	96.75	529.037	53.2432
Ladder bay	1	2	153.333	2825.53	879.168
Ladder bay	1	3	151.667	1178.18	69.2334
Ladder bay	2	1	178.333	633.208	70.404
Ladder bay	2	2	185	503.185	19.5237
Ladder bay	2	3	290	265.057	3.98443
Ladder bay	3	1	258.333	1325.49	25.999
Ladder bay	3	2	245	1547.99	81.3685
Ladder bay	3	3	163.333	668.641	15.9452
Torrens point	1	1	233.333	1640.22	161.555
Torrens point	1	2	198.333	1504.35	69.0734
Torrens point	1	3	240	258.171	11.8477
Torrens point	2	1	281.667	203.261	3.17402
Torrens point	2	2	378.333	258.315	23.5406
Torrens point	2	3	296.667	4051.21	636.32
Torrens point	3	1	183.333	122.624	2.07242
Torrens point	3	2	240	2562.42	353.474
Torrens point	3	3	233.333	959.707	22.6159
Diadema city	1	1	153.333	1189.22	18.5546
Diadema city	1	2	18.3333	209.687	3.14531
Diadema city	1	3	210	817.298	57.7888
Diadema city	2	1	78.3333	1298.21	65.5565
Diadema city	2	2	128.333	605.573	9.08931
Diadema city	2	3	186.667	1185.37	56.0599
Diadema city	3	1	63.3333	584.192	8.76289
Diadema city	3	2	201.667	122.561	1.84127
Diadema city	3	3	110	175.059	4.52105
Tent reef	1	1	305	418.721	48.3649
Tent reef	1	2	730	1517.32	160.647
Tent reef	1	3	601.667	1295.54	176.854
Tent reef	2	1	773.333	2907.33	47.1254
Tent reef	2	2	316.667	3902.86	368.352
Tent reef	2	3	776.667	3906.21	203.65
Tent reef	3	1	301.667	434.437	6.74961
Tent reef	3	2	330	477.665	7.16498
Tent reef	3	3	276.667	1067.54	57.0714

## Sheet: Fish Roving
Date	Survey	Researcher	Location	Depth (m)	common name	latin name	size class (cm)	number	Size	a	b	conversion	biomass	Echinoid_in_stomach	Predation_pressure
2023-05-04	1	AH	Ladder bay	7-9	Spotted trunkfish	L. bicaudalis	15-20	1	17.5	0.0295	3	1	158.102	10	15.8102
2023-05-04	1	AH	Ladder bay	7-9	Spanish hogfish	B. rufus	15-20	2	17.5	0.0144	3.053	1	179.634	14.4	25.8672
2023-05-04	1	AH	Ladder bay	7-9	Spanish hogfish	B. rufus	20-25	1	22.5	0.0144	3.053	1	193.453	14.4	27.8572
2023-05-04	1	AH	Ladder bay	7-9	Spanish hogfish	B. rufus	25-30	2	27.5	0.0144	3.053	1	713.962	14.4	102.811
2023-05-04	1	AH	Ladder bay	7-9	Yellowhead wrasse	H. garnoti	15-20	3	17.5	0.00519	3.375	1	244.086	3	7.32257
2023-05-04	1	AH	Ladder bay	7-9	Black margate	A. surinamensis	25-30	1	27.5	0.0117	3.2	0.868056	300.194	53.5	160.604
2023-05-04	1	AH	Ladder bay	7-9	Black margate	A. surinamensis	30-35	1	32.5	0.0117	3.2	0.868056	512.348	53.5	274.106
2023-05-04	1	AH	Ladder bay	7-9	Caesar grunt	H. carbonarium	10-15	4	12.5	0.0404	2.74	0.929368	133.909	10.9	14.5961
2023-05-04	1	AH	Ladder bay	7-9	Caesar grunt	H. carbonarium	20-25	2	22.5	0.0404	2.74	0.929368	335.14	10.9	36.5302
2023-05-04	1	AH	Ladder bay	7-9	Caesar grunt	H. carbonarium	25-30	12	27.5	0.0404	2.74	0.929368	3484.73	10.9	379.835
2023-05-04	1	AH	Ladder bay	7-9	French grunt	H. flavolineatum	10-15	9	12.5	0.017	3.05	0.917431	260.685	1.5	3.91028
2023-05-04	1	AH	Ladder bay	7-9	French grunt	H. flavolineatum	15-20	1	17.5	0.017	3.05	0.917431	80.8284	1.5	1.21243
2023-05-04	1	AH	Torrens point	7-9	Sharpnose puffer	C. rostrata	5-10	1	7.5	0.0729	2.5	1	11.23	3.8	0.426741
2023-05-04	1	AH	Torrens point	7-9	Smooth trunkfish	L. triqueter	5-10	2	7.5	0.309	2.23	1	55.2554	2.3	1.27088
2023-05-04	1	AH	Torrens point	7-9	Spanish hogfish	B. rufus	15-20	2	17.5	0.0144	3.053	1	179.634	14.4	25.8672
2023-05-04	1	AH	Torrens point	7-9	Spanish hogfish	B. rufus	20-25	5	22.5	0.0144	3.053	1	967.266	14.4	139.286
2023-05-04	1	AH	Torrens point	7-9	Spanish hogfish	B. rufus	25-30	4	27.5	0.0144	3.053	1	1427.92	14.4	205.621
2023-05-04	1	AH	Torrens point	7-9	Spanish hogfish	B. rufus	30-35	1	32.5	0.0144	3.053	1	594.487	14.4	85.6061
2023-05-04	1	AH	Torrens point	7-9	Puddingwife	H. radiatus	25-30	1	27.5	0.0131	3.038	1	309.004	19.9	61.4918
2023-05-04	1	AH	Torrens point	7-9	Caesar grunt	H. carbonarium	15-20	2	17.5	0.0404	2.74	0.929368	168.333	10.9	18.3483
2023-05-04	1	AH	Torrens point	7-9	Caesar grunt	H. carbonarium	20-25	2	22.5	0.0404	2.74	0.929368	335.14	10.9	36.5302
2023-05-04	1	AH	Torrens point	7-9	Caesar grunt	H. carbonarium	25-30	2	27.5	0.0404	2.74	0.929368	580.788	10.9	63.3058
2023-05-04	1	AH	Torrens point	7-9	Black margate	A. surinamensis	30-35	1	32.5	0.0117	3.2	0.868056	512.348	53.5	274.106
2023-05-04	1	AH	Torrens point	7-9	French grunt	H. flavolineatum	10-15	1	12.5	0.017	3.05	0.917431	28.965	1.5	0.434475
2023-05-04	1	AH	Torrens point	7-9	French grunt	H. flavolineatum	15-20	4	17.5	0.017	3.05	0.917431	323.314	1.5	4.84971
2023-05-04	1	AH	Torrens point	7-9	French grunt	H. flavolineatum	20-25	1	22.5	0.017	3.05	0.917431	173.962	1.5	2.60943
2023-05-09	1	AH	Tent reef	5-7	Smooth trunkfish	L. triqueter	5-10	2	7.5	0.309	2.23	1	55.2554	2.3	1.27088
2023-05-09	1	AH	Tent reef	5-7	Smooth trunkfish	L. triqueter	10-15	1	12.5	0.309	2.23	1	86.3113	2.3	1.98516
2023-05-09	1	AH	Tent reef	5-7	Spanish hogfish	B. rufus	15-20	1	17.5	0.0144	3.053	1	89.8168	14.4	12.9336
2023-05-09	1	AH	Tent reef	5-7	Spanish hogfish	B. rufus	20-25	3	22.5	0.0144	3.053	1	580.359	14.4	83.5717
2023-05-09	1	AH	Tent reef	5-7	Spanish hogfish	B. rufus	25-30	1	27.5	0.0144	3.053	1	356.981	14.4	51.4053
2023-05-09	1	AH	Tent reef	5-7	Caesar grunt	H. carbonarium	15-20	1	17.5	0.0404	2.74	0.929368	84.1666	10.9	9.17416
2023-05-09	1	AH	Tent reef	5-7	French grunt	H. flavolineatum	10-15	2	12.5	0.017	3.05	0.917431	57.93	1.5	0.86895
2023-05-09	1	AH	Tent reef	5-7	French grunt	H. flavolineatum	15-20	1	17.5	0.017	3.05	0.917431	80.8284	1.5	1.21243
2023-05-09	1	AH	Diadema city	7	Porcupinefish	D. hystrix	30-35	1	32.5	0.532	2.276	1	1468.78	34.6	508.2
2023-05-09	1	AH	Diadema city	7	Smooth trunkfish	L. triqueter	5-10	1	7.5	0.309	2.23	1	27.6277	2.3	0.635438
2023-05-09	1	AH	Diadema city	7	Smooth trunkfish	L. triqueter	10-15	4	12.5	0.309	2.23	1	345.245	2.3	7.94064
2023-05-09	1	AH	Diadema city	7	Smooth trunkfish	L. triqueter	15-20	3	17.5	0.309	2.23	1	548.346	2.3	12.612
2023-05-09	1	AH	Diadema city	7	Spanish hogfish	B. rufus	20-25	1	22.5	0.0144	3.053	1	193.453	14.4	27.8572
2023-05-09	1	AH	Diadema city	7	Black margate	A. surinamensis	20-25	3	22.5	0.0117	3.2	0.868056	473.853	53.5	253.511
2023-05-09	1	AH	Diadema city	7	Black margate	A. surinamensis	25-30	2	27.5	0.0117	3.2	0.868056	600.389	53.5	321.208
2023-05-09	1	AH	Diadema city	7	Black margate	A. surinamensis	30-35	6	32.5	0.0117	3.2	0.868056	3074.09	53.5	1644.64
2023-05-09	1	AH	Diadema city	7	Caesar grunt	H. carbonarium	15-20	1	17.5	0.0404	2.74	0.929368	84.1666	10.9	9.17416
2023-05-09	1	AH	Diadema city	7	Caesar grunt	H. carbonarium	20-25	2	22.5	0.0404	2.74	0.929368	335.14	10.9	36.5302
2023-05-09	1	AH	Diadema city	7	Caesar grunt	H. carbonarium	25-30	6	27.5	0.0404	2.74	0.929368	1742.36	10.9	189.918
2023-05-09	1	AH	Diadema city	7	Caesar grunt	H. carbonarium	30-35	1	32.5	0.0404	2.74	0.929368	458.961	10.9	50.0268
2023-05-09	1	AH	Diadema city	7	French grunt	H. flavolineatum	15-20	4	17.5	0.017	3.05	0.917431	323.314	1.5	4.84971
2023-05-09	1	AH	Diadema city	7	French grunt	H. flavolineatum	20-25	8	22.5	0.017	3.05	0.917431	1391.7	1.5	20.8755
2023-07-13	2	AH	Torrens point	15-8	Spanish hogfish	B. rufus	0-5	1	2.5	0.0144	3.053	1	0.236196	14.4	0.0340123
2023-07-13	2	AH	Torrens point	15-8	Spanish hogfish	B. rufus	10-15	3	12.5	0.0144	3.053	1	96.4606	14.4	13.8903
2023-07-13	2	AH	Torrens point	15-8	Spanish hogfish	B. rufus	15-20	2	17.5	0.0144	3.053	1	179.634	14.4	25.8672
2023-07-13	2	AH	Torrens point	15-8	Spanish hogfish	B. rufus	20-25	3	22.5	0.0144	3.053	1	580.359	14.4	83.5717
2023-07-13	2	AH	Torrens point	15-8	Caesar grunt	H. carbonarium	15-20	5	17.5	0.0404	2.74	0.929368	420.833	10.9	45.8708
2023-07-13	2	AH	Torrens point	15-8	Caesar grunt	H. carbonarium	20-25	14	22.5	0.0404	2.74	0.929368	2345.98	10.9	255.712
2023-07-13	2	AH	Torrens point	15-8	French grunt	H. flavolineatum	15-20	1	17.5	0.017	3.05	0.917431	80.8284	1.5	1.21243
2023-07-13	2	AH	Ladder bay	6-9	Spanish hogfish	B. rufus	10-15	1	12.5	0.0144	3.053	1	32.1535	14.4	4.63011
2023-07-13	2	AH	Ladder bay	6-9	Spanish hogfish	B. rufus	15-20	5	17.5	0.0144	3.053	1	449.084	14.4	64.6681
2023-07-13	2	AH	Ladder bay	6-9	Spanish hogfish	B. rufus	20-25	5	22.5	0.0144	3.053	1	967.266	14.4	139.286
2023-07-13	2	AH	Ladder bay	6-9	Spanish hogfish	B. rufus	25-30	3	27.5	0.0144	3.053	1	1070.94	14.4	154.216
2023-07-13	2	AH	Ladder bay	6-9	Spanish hogfish	B. rufus	30-35	1	32.5	0.0144	3.053	1	594.487	14.4	85.6061
2023-07-13	2	AH	Ladder bay	6-9	Puddingwife	H. radiatus	25-30	1	27.5	0.0131	3.038	1	309.004	19.9	61.4918
2023-07-13	2	AH	Ladder bay	6-9	Caesar grunt	H. carbonarium	20-25	2	22.5	0.0404	2.74	0.929368	335.14	10.9	36.5302
2023-07-13	2	AH	Ladder bay	6-9	Caesar grunt	H. carbonarium	25-30	5	27.5	0.0404	2.74	0.929368	1451.97	10.9	158.265
2023-07-13	2	AH	Ladder bay	6-9	French grunt	H. flavolineatum	15-20	4	17.5	0.017	3.05	0.917431	323.314	1.5	4.84971
2023-08-22	2	AH	Tent reef	5-9	Smooth trunkfish	L. triqueter	10-15	1	12.5	0.309	2.23	1	86.3113	2.3	1.98516
2023-08-22	2	AH	Tent reef	5-9	Smooth trunkfish	L. triqueter	15-20	1	17.5	0.309	2.23	1	182.782	2.3	4.20399
2023-08-22	2	AH	Tent reef	5-9	Smooth trunkfish	L. triqueter	20-25	1	22.5	0.309	2.23	1	320.129	2.3	7.36298
2023-08-22	2	AH	Tent reef	5-9	Spanish hogfish	B. rufus	10-15	1	12.5	0.0144	3.053	1	32.1535	14.4	4.63011
2023-08-22	2	AH	Tent reef	5-9	Spanish hogfish	B. rufus	15-20	1	17.5	0.0144	3.053	1	89.8168	14.4	12.9336
2023-08-22	2	AH	Tent reef	5-9	Spanish hogfish	B. rufus	20-25	3	22.5	0.0144	3.053	1	580.359	14.4	83.5717
2023-08-22	2	AH	Tent reef	5-9	Spanish hogfish	B. rufus	25-30	4	27.5	0.0144	3.053	1	1427.92	14.4	205.621
2023-08-22	2	AH	Tent reef	5-9	Puddingwife	H. radiatus	35-40	1	37.5	0.0131	3.038	1	792.827	19.9	157.773
2023-08-22	2	AH	Tent reef	5-9	Black margate	A. surinamensis	25-30	1	27.5	0.0117	3.2	0.868056	300.194	53.5	160.604
2023-08-22	2	AH	Tent reef	5-9	Caesar grunt	H. carbonarium	25-30	3	27.5	0.0404	2.74	0.929368	871.181	10.9	94.9588
2023-08-22	2	AH	Diadema city	7-8	Smooth trunkfish	L. triqueter	5-10	1	7.5	0.309	2.23	1	27.6277	2.3	0.635438
2023-08-22	2	AH	Diadema city	7-8	Smooth trunkfish	L. triqueter	10-15	1	12.5	0.309	2.23	1	86.3113	2.3	1.98516
2023-08-22	2	AH	Diadema city	7-8	Smooth trunkfish	L. triqueter	20-25	1	22.5	0.309	2.23	1	320.129	2.3	7.36298
2023-08-22	2	AH	Diadema city	7-8	Spotted trunkfish	L. bicaudalis	25-30	1	27.5	0.0295	3	1	613.508	10	61.3508
2023-08-22	2	AH	Diadema city	7-8	Spanish hogfish	B. rufus	5-10	1	7.5	0.0144	3.053	1	6.75965	14.4	0.97339
2023-08-22	2	AH	Diadema city	7-8	Spanish hogfish	B. rufus	25-30	1	27.5	0.0144	3.053	1	356.981	14.4	51.4053
2023-08-22	2	AH	Diadema city	7-8	Black margate	A. surinamensis	10-15	1	12.5	0.0117	3.2	0.868056	24.0796	53.5	12.8826
2023-08-22	2	AH	Diadema city	7-8	Black margate	A. surinamensis	15-20	1	17.5	0.0117	3.2	0.868056	70.674	53.5	37.8106
2023-08-22	2	AH	Diadema city	7-8	Black margate	A. surinamensis	20-25	1	22.5	0.0117	3.2	0.868056	157.951	53.5	84.5037
2023-08-22	2	AH	Diadema city	7-8	Black margate	A. surinamensis	25-30	3	27.5	0.0117	3.2	0.868056	900.583	53.5	481.812
2023-08-22	2	AH	Diadema city	7-8	Black margate	A. surinamensis	30-35	2	32.5	0.0117	3.2	0.868056	1024.7	53.5	548.212
2023-08-22	2	AH	Diadema city	7-8	Caesar grunt	H. carbonarium	15-20	1	17.5	0.0404	2.74	0.929368	84.1666	10.9	9.17416
2023-08-22	2	AH	Diadema city	7-8	Caesar grunt	H. carbonarium	20-25	2	22.5	0.0404	2.74	0.929368	335.14	10.9	36.5302
2023-08-22	2	AH	Diadema city	7-8	Caesar grunt	H. carbonarium	25-30	8	27.5	0.0404	2.74	0.929368	2323.15	10.9	253.223
2023-08-22	2	AH	Diadema city	7-8	French grunt	H. flavolineatum	15-20	4	17.5	0.017	3.05	0.917431	323.314	1.5	4.84971
2023-08-22	2	AH	Diadema city	7-8	French grunt	H. flavolineatum	20-25	3	22.5	0.017	3.05	0.917431	521.886	1.5	7.8283
2023-08-28	3	AH	Ladder bay	7-9	Smooth trunkfish	L. triqueter	10-15	1	12.5	0.309	2.23	1	86.3113	2.3	1.98516
2023-08-28	3	AH	Ladder bay	7-9	Smooth trunkfish	L. triqueter	15-20	1	17.5	0.309	2.23	1	182.782	2.3	4.20399
2023-08-28	3	AH	Ladder bay	7-9	Spanish hogfish	B. rufus	10-15	1	12.5	0.0144	3.053	1	32.1535	14.4	4.63011
2023-08-28	3	AH	Ladder bay	7-9	Spanish hogfish	B. rufus	15-20	2	17.5	0.0144	3.053	1	179.634	14.4	25.8672
2023-08-28	3	AH	Ladder bay	7-9	Spanish hogfish	B. rufus	20-25	2	22.5	0.0144	3.053	1	386.906	14.4	55.7145
2023-08-28	3	AH	Ladder bay	7-9	Spanish hogfish	B. rufus	25-30	4	27.5	0.0144	3.053	1	1427.92	14.4	205.621
2023-08-28	3	AH	Ladder bay	7-9	Spanish hogfish	B. rufus	30-35	1	32.5	0.0144	3.053	1	594.487	14.4	85.6061
2023-08-28	3	AH	Ladder bay	7-9	Puddingwife	H. radiatus	30-35	1	32.5	0.0131	3.038	1	513.302	19.9	102.147
2023-08-28	3	AH	Ladder bay	7-9	Black margate	A. surinamensis	35-40	2	37.5	0.0117	3.2	0.868056	1619.82	53.5	866.606
2023-08-28	3	AH	Ladder bay	7-9	Caesar grunt	H. carbonarium	20-25	4	22.5	0.0404	2.74	0.929368	670.279	10.9	73.0604
2023-08-28	3	AH	Ladder bay	7-9	Caesar grunt	H. carbonarium	25-30	3	27.5	0.0404	2.74	0.929368	871.181	10.9	94.9588
2023-08-28	3	AH	Ladder bay	7-9	Caesar grunt	H. carbonarium	30-35	1	32.5	0.0404	2.74	0.929368	458.961	10.9	50.0268
2023-08-28	3	AH	Ladder bay	7-9	French grunt	H. flavolineatum	20-25	7	22.5	0.017	3.05	0.917431	1217.74	1.5	18.266
2023-08-28	3	AH	Torrens point	8-10	Smooth trunkfish	L. triqueter	10-15	1	12.5	0.309	2.23	1	86.3113	2.3	1.98516
2023-08-28	3	AH	Torrens point	8-10	Smooth trunkfish	L. triqueter	15-20	1	17.5	0.309	2.23	1	182.782	2.3	4.20399
2023-08-28	3	AH	Torrens point	8-10	Spanish hogfish	B. rufus	20-25	2	22.5	0.0144	3.053	1	386.906	14.4	55.7145
2023-08-28	3	AH	Torrens point	8-10	Spanish hogfish	B. rufus	25-30	2	27.5	0.0144	3.053	1	713.962	14.4	102.811
2023-08-28	3	AH	Torrens point	8-10	Black margate	A. surinamensis	30-35	2	32.5	0.0117	3.2	0.868056	1024.7	53.5	548.212
2023-08-28	3	AH	Torrens point	8-10	Caesar grunt	H. carbonarium	20-25	7	22.5	0.0404	2.74	0.929368	1172.99	10.9	127.856
2023-08-28	3	AH	Torrens point	8-10	French grunt	H. flavolineatum	15-20	2	17.5	0.017	3.05	0.917431	161.657	1.5	2.42485
2023-08-28	3	AH	Torrens point	8-10	French grunt	H. flavolineatum	20-25	1	22.5	0.017	3.05	0.917431	173.962	1.5	2.60943
2023-09-26	3	AH	Diadema city	8.4-6.4	Porcupinefish	D. hystrix	30-35	1	32.5	0.532	2.276	1	1468.78	34.6	508.2
2023-09-26	3	AH	Diadema city	8.4-6.4	Spotted trunkfish	L. bicaudalis	10-15	1	12.5	0.0295	3	1	57.6172	10	5.76172
2023-09-26	3	AH	Diadema city	8.4-6.4	Spotted trunkfish	L. bicaudalis	15-20	1	17.5	0.0295	3	1	158.102	10	15.8102
2023-09-26	3	AH	Diadema city	8.4-6.4	Spotted trunkfish	L. bicaudalis	20-25	1	22.5	0.0295	3	1	336.023	10	33.6023
2023-09-26	3	AH	Diadema city	8.4-6.4	Spanish hogfish	B. rufus	5-10	1	7.5	0.0144	3.053	1	6.75965	14.4	0.97339
2023-09-26	3	AH	Diadema city	8.4-6.4	Black margate	A. surinamensis	15-20	2	17.5	0.0117	3.2	0.868056	141.348	53.5	75.6212
2023-09-26	3	AH	Diadema city	8.4-6.4	Black margate	A. surinamensis	20-25	4	22.5	0.0117	3.2	0.868056	631.803	53.5	338.015
2023-09-26	3	AH	Diadema city	8.4-6.4	Black margate	A. surinamensis	25-30	2	27.5	0.0117	3.2	0.868056	600.389	53.5	321.208
2023-09-26	3	AH	Diadema city	8.4-6.4	Black margate	A. surinamensis	30-35	1	32.5	0.0117	3.2	0.868056	512.348	53.5	274.106
2023-09-26	3	AH	Diadema city	8.4-6.4	Black margate	A. surinamensis	35-40	2	37.5	0.0117	3.2	0.868056	1619.82	53.5	866.606
2023-09-26	3	AH	Diadema city	8.4-6.4	Caesar grunt	H. carbonarium	20-25	3	22.5	0.0404	2.74	0.929368	502.71	10.9	54.7953
2023-09-26	3	AH	Diadema city	8.4-6.4	Caesar grunt	H. carbonarium	25-30	8	27.5	0.0404	2.74	0.929368	2323.15	10.9	253.223
2023-09-26	3	AH	Diadema city	8.4-6.4	Caesar grunt	H. carbonarium	30-35	5	32.5	0.0404	2.74	0.929368	2294.81	10.9	250.134
2023-09-26	3	AH	Diadema city	8.4-6.4	Caesar grunt	H. carbonarium	35-40	1	37.5	0.0404	2.74	0.929368	679.3	10.9	74.0437
2023-09-26	3	AH	Diadema city	8.4-6.4	French grunt	H. flavolineatum	10-15	1	12.5	0.017	3.05	0.917431	28.965	1.5	0.434475
2023-09-26	3	AH	Diadema city	8.4-6.4	French grunt	H. flavolineatum	15-20	7	17.5	0.017	3.05	0.917431	565.799	1.5	8.48699
2023-09-26	3	AH	Diadema city	8.4-6.4	French grunt	H. flavolineatum	20-25	7	22.5	0.017	3.05	0.917431	1217.74	1.5	18.266
2023-09-26	3	AH	Tent reef	4.9-6.8	Smooth trunkfish	L. triqueter	15-20	1	17.5	0.309	2.23	1	182.782	2.3	4.20399
2023-09-26	3	AH	Tent reef	4.9-6.8	Smooth trunkfish	L. triqueter	20-25	1	22.5	0.309	2.23	1	320.129	2.3	7.36298
2023-09-26	3	AH	Tent reef	4.9-6.8	Spanish hogfish	B. rufus	5-10	1	7.5	0.0144	3.053	1	6.75965	14.4	0.97339
2023-09-26	3	AH	Tent reef	4.9-6.8	Spanish hogfish	B. rufus	15-20	1	17.5	0.0144	3.053	1	89.8168	14.4	12.9336
2023-09-26	3	AH	Tent reef	4.9-6.8	Spanish hogfish	B. rufus	20-25	1	22.5	0.0144	3.053	1	193.453	14.4	27.8572
2023-09-26	3	AH	Tent reef	4.9-6.8	Spanish hogfish	B. rufus	25-30	1	27.5	0.0144	3.053	1	356.981	14.4	51.4053
2023-09-26	3	AH	Tent reef	4.9-6.8	Spanish hogfish	B. rufus	30-35	1	32.5	0.0144	3.053	1	594.487	14.4	85.6061
2023-09-26	3	AH	Tent reef	4.9-6.8	Caesar grunt	H. carbonarium	20-25	1	22.5	0.0404	2.74	0.929368	167.57	10.9	18.2651
2023-09-26	3	AH	Tent reef	4.9-6.8	Caesar grunt	H. carbonarium	25-30	2	27.5	0.0404	2.74	0.929368	580.788	10.9	63.3058
2023-09-26	3	AH	Tent reef	4.9-6.8	French grunt	H. flavolineatum	15-20	1	17.5	0.017	3.05	0.917431	80.8284	1.5	1.21243

## Sheet: Roving per species
Common name	Location	Survey	Number	Biomass	Predation pressure
Spotted trunkfish	Diadema city	1	0	0	0
Honeycomb cowfish	Diadema city	1	0	0	0
Spanish hogfish	Diadema city	1	1	193.453	27.8572
Yellowhead wrasse	Diadema city	1	0	0	0
Black margate	Diadema city	1	11	4148.33	2219.35
Caesar grunt	Diadema city	1	10	2620.63	285.649
French grunt	Diadema city	1	12	1715.01	25.7252
Sharpnose puffer	Diadema city	1	0	0	0
Smooth trunkfish	Diadema city	1	8	921.219	21.188
Puddingwife	Diadema city	1	0	0	0
Porcupinefish	Diadema city	1	1	1468.78	508.2
Spotted trunkfish	Diadema city	2	1	613.508	61.3508
Honeycomb cowfish	Diadema city	2	0	0	0
Spanish hogfish	Diadema city	2	2	363.741	52.3787
Yellowhead wrasse	Diadema city	2	0	0	0
Black margate	Diadema city	2	8	2177.98	1165.22
Caesar grunt	Diadema city	2	11	2742.46	298.928
French grunt	Diadema city	2	7	845.2	12.678
Sharpnose puffer	Diadema city	2	0	0	0
Smooth trunkfish	Diadema city	2	3	434.068	9.98357
Puddingwife	Diadema city	2	0	0	0
Porcupinefish	Diadema city	2	0	0	0
Spotted trunkfish	Diadema city	3	3	551.742	55.1742
Honeycomb cowfish	Diadema city	3	0	0	0
Spanish hogfish	Diadema city	3	1	6.75965	0.97339
Yellowhead wrasse	Diadema city	3	0	0	0
Black margate	Diadema city	3	11	3505.71	1875.56
Caesar grunt	Diadema city	3	17	5799.97	632.196
French grunt	Diadema city	3	15	1812.5	27.1875
Sharpnose puffer	Diadema city	3	0	0	0
Smooth trunkfish	Diadema city	3	0	0	0
Puddingwife	Diadema city	3	0	0	0
Porcupinefish	Diadema city	3	1	1468.78	508.2
Spotted trunkfish	Tent reef	1	0	0	0
Honeycomb cowfish	Tent reef	1	0	0	0
Spanish hogfish	Tent reef	1	5	1027.16	147.911
Yellowhead wrasse	Tent reef	1	0	0	0
Black margate	Tent reef	1	0	0	0
Caesar grunt	Tent reef	1	1	84.1666	9.17416
French grunt	Tent reef	1	3	138.758	2.08138
Sharpnose puffer	Tent reef	1	0	0	0
Smooth trunkfish	Tent reef	1	3	141.567	3.25604
Puddingwife	Tent reef	1	0	0	0
Porcupinefish	Tent reef	1	0	0	0
Spotted trunkfish	Tent reef	2	0	0	0
Honeycomb cowfish	Tent reef	2	0	0	0
Spanish hogfish	Tent reef	2	9	2130.25	306.757
Yellowhead wrasse	Tent reef	2	0	0	0
Black margate	Tent reef	2	1	300.194	160.604
Caesar grunt	Tent reef	2	3	871.181	94.9588
French grunt	Tent reef	2	0	0	0
Sharpnose puffer	Tent reef	2	0	0	0
Smooth trunkfish	Tent reef	2	3	589.223	13.5521
Puddingwife	Tent reef	2	1	792.827	157.773
Porcupinefish	Tent reef	2	0	0	0
Spotted trunkfish	Tent reef	3	0	0	0
Honeycomb cowfish	Tent reef	3	0	0	0
Spanish hogfish	Tent reef	3	5	1241.5	178.776
Yellowhead wrasse	Tent reef	3	0	0	0
Black margate	Tent reef	3	0	0	0
Caesar grunt	Tent reef	3	3	748.357	81.571
French grunt	Tent reef	3	1	80.8284	1.21243
Sharpnose puffer	Tent reef	3	0	0	0
Smooth trunkfish	Tent reef	3	2	502.911	11.567
Puddingwife	Tent reef	3	0	0	0
Porcupinefish	Tent reef	3	0	0	0
Spotted trunkfish	Ladder bay	1	1	158.102	15.8102
Honeycomb cowfish	Ladder bay	1	0	0	0
Spanish hogfish	Ladder bay	1	5	1087.05	156.535
Yellowhead wrasse	Ladder bay	1	3	244.086	7.32257
Black margate	Ladder bay	1	2	812.542	434.71
Caesar grunt	Ladder bay	1	18	3953.77	430.961
French grunt	Ladder bay	1	10	341.513	5.1227
Sharpnose puffer	Ladder bay	1	0	0	0
Smooth trunkfish	Ladder bay	1	0	0	0
Puddingwife	Ladder bay	1	0	0	0
Porcupinefish	Ladder bay	1	0	0	0
Spotted trunkfish	Ladder bay	2	0	0	0
Honeycomb cowfish	Ladder bay	2	0	0	0
Spanish hogfish	Ladder bay	2	15	3113.93	448.406
Yellowhead wrasse	Ladder bay	2	0	0	0
Black margate	Ladder bay	2	0	0	0
Caesar grunt	Ladder bay	2	7	1787.11	194.795
French grunt	Ladder bay	2	4	323.314	4.84971
Sharpnose puffer	Ladder bay	2	0	0	0
Smooth trunkfish	Ladder bay	2	0	0	0
Puddingwife	Ladder bay	2	1	309.004	61.4918
Porcupinefish	Ladder bay	2	0	0	0
Spotted trunkfish	Ladder bay	3	0	0	0
Honeycomb cowfish	Ladder bay	3	0	0	0
Spanish hogfish	Ladder bay	3	10	2621.1	377.439
Yellowhead wrasse	Ladder bay	3	0	0	0
Black margate	Ladder bay	3	2	1619.82	866.606
Caesar grunt	Ladder bay	3	8	2000.42	218.046
French grunt	Ladder bay	3	7	1217.74	18.266
Sharpnose puffer	Ladder bay	3	0	0	0
Smooth trunkfish	Ladder bay	3	2	269.093	6.18915
Puddingwife	Ladder bay	3	1	513.302	102.147
Porcupinefish	Ladder bay	3	0	0	0
Spotted trunkfish	Torrens point	1	0	0	0
Honeycomb cowfish	Torrens point	1	0	0	0
Spanish hogfish	Torrens point	1	12	3169.31	456.381
Yellowhead wrasse	Torrens point	1	0	0	0
Black margate	Torrens point	1	1	512.348	274.106
Caesar grunt	Torrens point	1	6	1084.26	118.184
French grunt	Torrens point	1	6	526.241	7.89361
Sharpnose puffer	Torrens point	1	1	11.23	0.426741
Smooth trunkfish	Torrens point	1	2	55.2554	1.27088
Puddingwife	Torrens point	1	1	309.004	61.4918
Porcupinefish	Torrens point	1	0	0	0
Spotted trunkfish	Torrens point	2	0	0	0
Honeycomb cowfish	Torrens point	2	0	0	0
Spanish hogfish	Torrens point	2	9	856.69	123.363
Yellowhead wrasse	Torrens point	2	0	0	0
Black margate	Torrens point	2	0	0	0
Caesar grunt	Torrens point	2	19	2766.81	301.582
French grunt	Torrens point	2	1	80.8284	1.21243
Sharpnose puffer	Torrens point	2	0	0	0
Smooth trunkfish	Torrens point	2	0	0	0
Puddingwife	Torrens point	2	0	0	0
Porcupinefish	Torrens point	2	0	0	0
Spotted trunkfish	Torrens point	3	0	0	0
Honeycomb cowfish	Torrens point	3	0	0	0
Spanish hogfish	Torrens point	3	4	1100.87	158.525
Yellowhead wrasse	Torrens point	3	0	0	0
Black margate	Torrens point	3	2	1024.7	548.212
Caesar grunt	Torrens point	3	7	1172.99	127.856
French grunt	Torrens point	3	3	335.619	5.03429
Sharpnose puffer	Torrens point	3	0	0	0
Smooth trunkfish	Torrens point	3	2	269.093	6.18915
Puddingwife	Torrens point	3	0	0	0
Porcupinefish	Torrens point	3	0	0	0

## Sheet: Roving total
Location	Survey	Number	Biomass	Predation_pressure
Diadema city	1	43	11067.4	3087.97
Diadema city	2	32	7176.96	1600.54
Diadema city	3	48	13145.5	3099.29
Tent reef	1	12	1391.65	162.422
Tent reef	2	17	4683.68	733.644
Tent reef	3	11	2573.59	273.126
Ladder bay	1	39	6597.07	1050.46
Ladder bay	2	27	5533.36	709.543
Ladder bay	3	30	8241.48	1588.69
Torrens point	1	29	5667.65	919.754
Torrens point	2	29	3704.33	426.158
Torrens point	3	18	3903.26	845.816

## Sheet: Diadema count
Date	Year	Researcher	Location	Transect_ID	Diadema	Density	Original data
2022-03-10	2022	Alex Last	Ladder bay	LB1	0	0	GCRMN 2022
2022-03-10	2022	Alex Last	Ladder bay	LB2	0	0	GCRMN 2022
2022-03-10	2022	Alex Last	Ladder bay	LB3	0	0	GCRMN 2022
2022-03-03	2022	Alex Last	Tent reef	TR1	0	0	GCRMN 2022
2022-03-03	2022	Alex Last	Tent reef	TR2	4	0.0666667	GCRMN 2022
2022-03-03	2022	Alex Last	Tent reef	TR3	1	0.0166667	GCRMN 2022
2022-05-03	2022	Alwin Hylkema	Torrens point	TO1	0	0	GCRMN 2022
2022-05-03	2022	Alwin Hylkema	Torrens point	TO2	2	0.0333333	GCRMN 2022
2022-05-03	2022	Alwin Hylkema	Torrens point	TO3	0	0	GCRMN 2022
2022-04-27	2022	Oliver Klokman	Diadema city	DC1	2	0.0333333	Die-off and recovery Diadema city
2022-04-27	2022	Bob	Diadema city	DC2	2	0.0333333	Die-off and recovery Diadema city
2022-04-27	2022	Oliver Klokman	Diadema city	DC3	1	0.0166667	Die-off and recovery Diadema city
2023-03-14	2023	Oliver Klokman	Tent reef	TR1	1	0.0166667	4 locations comparison (this file)
2023-03-14	2023	Oliver Klokman	Tent reef	TR2	3	0.05	4 locations comparison (this file)
2023-03-14	2023	Oliver Klokman	Tent reef	TR3	0	0	4 locations comparison (this file)
2023-03-28	2023	Oliver Klokman	Ladder bay	LB1	0	0	4 locations comparison (this file)
2023-03-28	2023	Oliver Klokman	Ladder bay	LB2	0	0	4 locations comparison (this file)
2023-03-28	2023	Oliver Klokman	Ladder bay	LB3	0	0	4 locations comparison (this file)
2023-03-28	2023	Oliver Klokman	Torrens point	TO1	0	0	4 locations comparison (this file)
2023-03-28	2023	Oliver Klokman	Torrens point	TO2	0	0	4 locations comparison (this file)
2023-03-28	2023	Oliver Klokman	Torrens point	TO3	0	0	4 locations comparison (this file)
2023-03-14	2023	Oliver Klokman	Diadema city	DC1	66	1.1	Die-off and recovery Diadema city
2023-03-14	2023	Oliver Klokman	Diadema city	DC2	146	2.43333	Die-off and recovery Diadema city
2023-03-14	2023	Oliver Klokman	Diadema city	DC3	46	0.766667	Die-off and recovery Diadema city

## Sheet: Invertebrate Transects
Date	Day/Night	Researcher	Location	Survey	Transect	Depth (m)	Organism	Size (cm)	Size2	frequency	Number	Type	remarks
2023-05-30	Night	OK	Diadema city	1	3	7	hermit crab	0.8	0.8	1	1.66667	micro
2023-05-30	Night	OK	Tent reef	1	1	6	shrimp	0-.5	0.25	39	65	micro	majority are red night shrimp (Cinetorhynchus manningi)
2023-05-30	Night	OK	Tent reef	1	1	6	spotted lobster	3.5	3.5	1	1.66667	macro
2023-05-30	Night	OK	Tent reef	1	2	5	shrimp	0-.5	0.25	45	75	micro
2023-05-30	Night	OK	Tent reef	1	3	5	shrimp	0-.5	0.25	47	78.3333	micro
2023-05-30	Night	OK	Diadema city	1	1	7	shrimp	0-.5	0.25	295	491.667	micro
2023-05-30	Night	OK	Diadema city	1	1	7	shrimp	.5-1	0.75	80	133.333	micro
2023-05-30	Night	OK	Diadema city	1	1	7	shrimp	1-1.5	1.25	5	8.33333	micro
2023-05-30	Night	OK	Diadema city	1	2	7	shrimp	0-.5	0.25	465	775	micro
2023-05-30	Night	OK	Diadema city	1	2	7	shrimp	.5-1	0.75	150	250	micro
2023-05-30	Night	OK	Diadema city	1	1	7	brittle star	.5-1	0.75	15	25	micro
2023-05-30	Night	OK	Diadema city	1	2	7	spotted lobster	3.5	3.5	1	1.66667	macro
2023-05-30	Night	OK	Diadema city	1	2	7	brittle star	.5-1	0.75	25	41.6667	micro
2023-05-30	Night	OK	Diadema city	1	3	7	brittle star	.5-1	0.75	10	16.6667	micro
2023-05-30	Night	OK	Diadema city	1	3	7	shrimp	0-.5	0.25	166	276.667	micro
2023-05-30	Night	OK	Diadema city	1	3	7	shrimp	.5-1	0.75	40	66.6667	micro
2023-05-30	Night	OK	Diadema city	1	3	7	shrimp	1-1.5	1.25	2	3.33333	micro
2023-05-30	Night	OK	Diadema city	1	3	7	spotted lobster	3.8	3.8	1	1.66667	macro
2023-05-30	Night	OK	Tent reef	1	2	5	hermit crab	1.9	1.9	1	1.66667	micro
2023-05-30	Night	OK	Tent reef	1	1	6	hermit crab	2.6	2.6	1	1.66667	micro
2023-05-30	Night	OK	Diadema city	1	1	7	brittle star	0-.5	0.25	5	8.33333	micro
2023-05-30	Night	OK	Diadema city	1	1	7	hermit crab	2.6	2.6	1	1.66667	micro
2023-05-30	Night	OK	Diadema city	1	2	7	hermit crab	4.5	4.5	1	1.66667	macro	in a helmet conch shell
2023-05-30	Night	OK	Diadema city	1	2	7	hermit crab	4.9	4.9	1	1.66667	macro
2023-05-30	Night	OK	Diadema city	1	2	7	brittle star	0-.5	0.25	10	16.6667	micro
2023-05-30	Night	OK	Diadema city	1	3	7	brittle star	0-1	0.5	15	25	micro
2023-05-30	Night	OK	Diadema city	1	3	7	brittle star	1-1.5	1.25	2	3.33333	micro
2023-05-30	Night	OK	Tent reef	1	1	6	crab other	1.6	1.6	1	1.66667	micro
2023-05-30	Night	OK	Tent reef	1	1	6	crab other	0.4	0.4	1	1.66667	micro
2023-05-30	Night	OK	Diadema city	1	1	7	brittle star	1.5-2	1.75	5	8.33333	micro
2023-06-20	Night	OK	Diadema city	2	1	7	hermit crab	1.1	1.1	1	1.66667	micro
2023-06-20	Night	OK	Diadema city	2	1	7	brittle star	.5-1	0.75	57	95	micro
2023-06-20	Night	OK	Tent reef	2	1	6	hermit crab	1.8	1.8	1	1.66667	micro
2023-06-20	Night	OK	Diadema city	2	1	7	hermit crab	2	2	1	1.66667	micro
2023-06-20	Night	OK	Diadema city	2	1	7	spotted lobster	4.4	4.4	1	1.66667	macro
2023-06-20	Night	OK	Diadema city	2	1	7	spotted lobster	4.6	4.6	1	1.66667	macro
2023-06-20	Night	OK	Diadema city	2	1	7	spotted lobster	4.7	4.7	1	1.66667	macro
2023-06-20	Night	OK	Diadema city	2	1	7	shrimp	0-.5	0.25	295	491.667	micro
2023-06-20	Night	OK	Diadema city	2	1	7	shrimp	.5-1	0.75	85	141.667	micro
2023-06-20	Night	OK	Diadema city	2	1	7	shrimp	1-1.5	1.25		0	micro
2023-06-20	Night	OK	Diadema city	2	1	7	crab other	0.6	0.6	1	1.66667	micro
2023-06-20	Night	OK	Diadema city	2	2	7	brittle star	.5-1	0.75	54	90	micro
2023-06-20	Night	OK	Diadema city	2	3	7	brittle star	.5-1	0.75	70	116.667	micro
2023-06-20	Night	OK	Diadema city	2	1	7	hermit crab	2.4	2.4	1	1.66667	micro
2023-06-20	Night	OK	Diadema city	2	2	7	shrimp	0-.5	0.25	285	475	micro
2023-06-20	Night	OK	Diadema city	2	2	7	shrimp	.5-1	0.75	225	375	micro
2023-06-20	Night	OK	Diadema city	2	2	7	shrimp	1-1.5	1.25	100	166.667	micro
2023-06-20	Night	OK	Diadema city	2	2	7	spotted lobster	4.1	4.1	1	1.66667	macro
2023-06-20	Night	OK	Diadema city	2	3	7	shrimp	0-.5	0.25	337	561.667	micro
2023-06-20	Night	OK	Diadema city	2	3	7	shrimp	.5-1	0.75	272	453.333	micro
2023-06-20	Night	OK	Diadema city	2	3	7	shrimp	1-1.5	1.25	30	50	micro
2023-06-20	Night	OK	Tent reef	2	1	6	shrimp	.5-1	0.75	2	3.33333	micro	Total Diadema counted was 23 (jveniles). Many black durgeon sleeping in a fissure in the reef.
2023-06-20	Night	OK	Tent reef	2	1	6	shrimp	0-.5	0.25	32	53.3333	micro
2023-06-20	Night	OK	Tent reef	2	1	6	spotted lobster	5.1	5.1	1	1.66667	macro
2023-06-20	Night	OK	Diadema city	2	1	7	hermit crab	2.4	2.4	1	1.66667	micro
2023-06-20	Night	OK	Tent reef	2	2	4	spotted lobster	5.8	5.8	1	1.66667	macro
2023-06-20	Night	OK	Tent reef	2	2	4	shrimp	0-.5	0.25	61	101.667	micro
2023-06-20	Night	OK	Tent reef	2	3	5	Spiny lobster	10.5	10.5	1	1.66667	macro
2023-06-20	Night	OK	Tent reef	2	3	5	shrimp	0-.5	0.25	58	96.6667	micro
2023-06-20	Night	OK	Diadema city	2	2	7	hermit crab	7.1	7.1	1	1.66667	macro
2023-06-20	Night	OK	Diadema city	2	2	7	brittle star	0-.5	0.25	125	208.333	micro
2023-06-20	Night	OK	Diadema city	2	1	7	brittle star	0-1	0.5	85	141.667	micro
2023-06-20	Night	OK	Diadema city	2	3	7	brittle star	0-1	0.5	180	300	micro
2023-06-20	Night	OK	Diadema city	2	2	7	brittle star	1-1.5	1.25	34	56.6667	micro
2023-06-20	Night	OK	Diadema city	2	3	7	brittle star	1-1.5	1.25	10	16.6667	micro
2023-06-20	Night	OK	Tent reef	2	2	4	crab other	0.6	0.6	1	1.66667	micro
2023-06-20	Night	OK	Tent reef	2	2	4	crab other	0.5	0.5	2	3.33333	micro
2023-06-20	Night	OK	Diadema city	2	1	7	crab other	0.4	0.4	1	1.66667	micro
2023-06-20	Night	OK	Tent reef	2	2	4	crab other	0.4	0.4	1	1.66667	micro
2023-08-23	Night	Ok	Ladder bay	1	2	7	crab other	0.7	0.7	1	1.66667	micro
2023-08-23	Night	Ok	Torrens point	1	1	8	brittle star	.5-1	0.75	32	53.3333	micro
2023-08-23	Night	Ok	Torrens point	1	2	8	brittle star	.5-1	0.75	26	43.3333	micro
2023-08-23	Night	Ok	Torrens point	1	3	8	brittle star	.5-1	0.75	8	13.3333	micro
2023-08-23	Night	Ok	Torrens point	1	1	8	brittle star	0-.5	0.25	67	111.667	micro
2023-08-23	Night	Ok	Torrens point	1	2	8	brittle star	0-.5	0.25	43	71.6667	micro
2023-08-23	Night	Ok	Torrens point	1	3	8	brittle star	0-.5	0.25	11	18.3333	micro
2023-08-23	Night	Ok	Torrens point	1	1	8	shrimp	1.2	1.2	2	3.33333	micro
2023-08-23	Night	Ok	Torrens point	1	1	8	shrimp	1.3	1.3	3	5	micro
2023-08-23	Night	Ok	Torrens point	1	1	8	spotted lobster	7	7	1	1.66667	macro
2023-08-23	Night	Ok	Torrens point	1	2	8	hermit crab	0.6	0.6	1	1.66667	micro
2023-08-23	Night	Ok	Ladder bay	1	1	9	hermit crab	0.8	0.8	2	3.33333	micro
2023-08-23	Night	Ok	Torrens point	1	3	8	shrimp	0.5	0.5	1	1.66667	micro
2023-08-23	Night	Ok	Ladder bay	1	1	9	shrimp	0.3	0.3	15	25	micro
2023-08-23	Night	Ok	Ladder bay	1	1	9	crab other	0.2	0.2	1	1.66667	micro
2023-08-23	Night	Ok	Ladder bay	1	1	9	crab other	1.2	1.2	1	1.66667	micro
2023-08-23	Night	Ok	Ladder bay	1	2	7	shrimp	0.3	0.3	41	68.3333	micro
2023-08-23	Night	Ok	Ladder bay	1	3	6	helmet conch	22	22	1	1.66667	macro
2023-08-23	Night	Ok	Ladder bay	1	3	6	shrimp	0.3	0.3	22	36.6667	micro
2023-08-23	Night	Ok	Ladder bay	1	3	6	brittle star	0.5	0.5	1	1.66667	micro
2023-08-23	Night	Ok	Ladder bay	1	3	6	hermit crab	1.8	1.8	1	1.66667	micro
2023-08-23	Night	Ok	Torrens point	1	3	8	hermit crab	12.2	12.2	1	1.66667	macro	giant hermit crab
2023-08-23	Night	Ok	Torrens point	1	3	8	hermit crab	14.5	14.5	1	1.66667	macro	giant hermit crab
2023-08-23	Night	Ok	Torrens point	1	2	8	hermit crab	2.2	2.2	1	1.66667	micro
2023-08-23	Night	Ok	Ladder bay	1	3	6	hermit crab	2.9	2.9	1	1.66667	micro
2023-08-23	Night	Ok	Ladder bay	1	1	9	hermit crab	3.4	3.4	1	1.66667	macro
2023-08-23	Night	Ok	Torrens point	1	1	8	brittle star	1-1.5	1.25	30	50	micro
2023-08-23	Night	Ok	Torrens point	1	2	8	brittle star	1-1.5	1.25	18	30	micro
2023-08-23	Night	Ok	Torrens point	1	3	8	brittle star	1-1.5	1.25	13	21.6667	micro
2023-08-30	Night	OK	Tent reef	3	2		crab other	2.7	2.7	1	1.66667	micro
2023-08-30	Night	OK	Diadema city	3	3		crab other	0.5	0.5	1	1.66667	micro
2023-08-30	Night	OK	Tent reef	3	1		brittle star	.5-1	0.75	19	31.6667	micro
2023-08-30	Night	OK	Diadema city	3	2		brittle star	.5-1	0.75	34	56.6667	micro
2023-08-30	Night	OK	Diadema city	3	3		brittle star	.5-1	0.75	13	21.6667	micro
2023-08-30	Night	OK	Tent reef	3	1		crab other	0.4	0.4	1	1.66667	micro
2023-08-30	Night	OK	Tent reef	3	1		crab other	0.3	0.3	1	1.66667	micro
2023-08-30	Night	OK	Tent reef	3	1		brittle star	0-.5	0.25	39	65	micro
2023-08-30	Night	OK	Tent reef	3	2		brittle star	0-.5	0.25	22	36.6667	micro
2023-08-30	Night	OK	Tent reef	3	3		brittle star	0-.5	0.25	1	1.66667	micro
2023-08-30	Night	OK	Diadema city	3	2		brittle star	0-.5	0.25	10	16.6667	micro
2023-08-30	Night	OK	Tent reef	3	1		crab other	0.2	0.2	1	1.66667	micro
2023-08-30	Night	OK	Tent reef	3	3		crab other	0.2	0.2	1	1.66667	micro
2023-08-30	Night	OK	Diadema city	3	1		crab other	0.2	0.2	1	1.66667	micro
2023-08-30	Night	OK	Tent reef	3	1		hermit crab	2.2	2.2	1	1.66667	micro
2023-08-30	Night	OK	Tent reef	3	1		shrimp	0-.5	0.25	9	15	micro
2023-08-30	Night	OK	Tent reef	3	1		helmet conch	2.1	2.1	1	1.66667	micro
2023-08-30	Night	OK	Tent reef	3	1		spotted lobster	6.8	6.8	1	1.66667	macro
2023-08-30	Night	OK	Tent reef	3	2		shrimp	0-5	2.5	7	11.6667	micro
2023-08-30	Night	OK	Tent reef	3	2		shrimp	1-1.5	1.25	1	1.66667	micro
2023-08-30	Night	OK	Tent reef	3	3		shrimp	.5-1	0.75	2	3.33333	micro
2023-08-30	Night	OK	Tent reef	3	1		brittle star	1-1.5	1.25	2	3.33333	micro
2023-08-30	Night	OK	Diadema city	3	1		shrimp	0-.5	0.25	415	691.667	micro
2023-08-30	Night	OK	Diadema city	3	1		shrimp	.5-1	0.75	135	225	micro
2023-08-30	Night	OK	Diadema city	3	1		shrimp	1-1.5	1.25	40	66.6667	micro
2023-08-30	Night	OK	Diadema city	3	1		shrimp	0-.5	0.25	8	13.3333	micro
2023-08-30	Night	OK	Diadema city	3	1		shrimp	.5-1	0.75	57	95	micro
2023-08-30	Night	OK	Diadema city	3	1		shrimp	1-1.5	1.25	23	38.3333	micro
2023-08-30	Night	OK	Diadema city	3	2		brittle star	1-1.5	1.25	28	46.6667	micro
2023-08-30	Night	OK	Diadema city	3	2		shrimp	0-.5	0.25	760	1266.67	micro
2023-08-30	Night	OK	Diadema city	3	2		shrimp	.5-1	0.75	231	385	micro
2023-08-30	Night	OK	Diadema city	3	2		shrimp	1-1.5	1.25	88	146.667	micro
2023-08-30	Night	OK	Diadema city	3	3		brittle star	1-1.5	1.25	3	5	micro
2023-08-30	Night	OK	Diadema city	3	1		brittle star	1.5-2	1.75	6	10	micro
2023-08-30	Night	OK	Diadema city	3	2		Spiny lobster	13	13	1	1.66667	macro
2023-08-30	Night	OK	Diadema city	3	2		hermit crab	8	8	1	1.66667	macro
2023-08-30	Night	OK	Diadema city	3	2		hermit crab	9	9	1	1.66667	macro
2023-08-30	Night	OK	Diadema city	3	3		shrimp	0-.5	0.25	140	233.333	micro
2023-08-30	Night	OK	Diadema city	3	3		shrimp	.5-1	0.75	121	201.667	micro
2023-08-30	Night	OK	Diadema city	3	3		shrimp	1-1.5	1.25	9	15	micro
2023-08-30	Night	OK	Diadema city	3	2		brittle star	1.5-2	1.75	10	16.6667	micro
2023-08-30	Night	OK	Diadema city	3	3		spotted lobster	4.5	4.5	1	1.66667	macro
2023-08-30	Night	OK	Diadema city	3	3		spotted lobster	5.5	5.5	1	1.66667	macro
2023-09-25	Night	OK	Torrens point	2	1		shrimp	0-.5	0.25	34	56.6667	micro
2023-09-25	Night	OK	Torrens point	2	1		brittle star	0-.5	0.25	67	111.667	micro
2023-09-25	Night	OK	Torrens point	2	1		crab other	0.6	0.6	1	1.66667	micro
2023-09-25	Night	OK	Torrens point	2	2		crab other	0.4	0.4	1	1.66667	micro
2023-09-25	Night	OK	Torrens point	2	2		hermit crab	2.2	2.2	1	1.66667	micro
2023-09-25	Night	OK	Torrens point	2	2		hermit crab	4.5	4.5	1	1.66667	macro
2023-09-25	Night	OK	Torrens point	2	2		hermit crab	2.6	2.6	1	1.66667	micro
2023-09-25	Night	OK	Torrens point	2	2		shrimp	0-.5	0.25	27	45	micro
2023-09-25	Night	OK	Torrens point	2	2		brittle star	0-.5	0.25	67	111.667	micro
2023-09-25	Night	OK	Torrens point	2	3		brittle star	0-.5	0.25	74	123.333	micro
2023-09-25	Night	OK	Torrens point	2	3		brittle star	.5-1	0.75	6	10	micro
2023-09-25	Night	OK	Torrens point	2	3		shrimp	0-.5	0.25	29	48.3333	micro
2023-09-25	Night	OK	Torrens point	2	3		shrimp	.5-1	0.75	12	20	micro
2023-09-25	Night	OK	Torrens point	2	3		hermit crab	5.9	5.9	1	1.66667	macro
2023-09-25	Night	OK	Torrens point	2	3		hermit crab	2.3	2.3	1	1.66667	micro
2023-09-25	Night	OK	Ladder bay	2	1		shrimp	0-.5	0.25	4	6.66667	micro
2023-09-25	Night	OK	Ladder bay	2	1		brittle star	0-.5	0.25	22	36.6667	micro
2023-09-25	Night	OK	Ladder bay	2	2		hermit crab	1.2	1.2	1	1.66667	micro
2023-09-25	Night	OK	Ladder bay	2	2		hermit crab	3.3	3.3	1	1.66667	macro
2023-09-25	Night	OK	Ladder bay	2	2		crab other	1.3	1.3	1	1.66667	micro
2023-09-25	Night	OK	Ladder bay	2	2		shrimp	.5-1	0.75	1	1.66667	micro
2023-09-25	Night	OK	Ladder bay	2	3		hermit crab	0.8	0.8	1	1.66667	micro
2023-09-25	Night	OK	Ladder bay	2	3		hermit crab	2.5	2.5	1	1.66667	micro
2023-09-25	Night	OK	Ladder bay	2	3		hermit crab	10.2	10.2	1	1.66667	macro
2023-10-17	Night	OK	Torrens point	3	1		brittle star	0-.5	0.25	138	230	micro
2023-10-17	Night	OK	Torrens point	3	1		brittle star	.5-1	0.75	36	60	micro
2023-10-17	Night	OK	Torrens point	3	1		brittle star	1-1.5	1.25	2	3.33333	micro
2023-10-17	Night	OK	Torrens point	3	1		shrimp	0-.5	0.25	6	10	micro
2023-10-17	Night	OK	Torrens point	3	1		shrimp	.5-1	0.75	3	5	micro
2023-10-17	Night	OK	Torrens point	3	1		spotted lobster	2.5	2.5	1	1.66667	micro
2023-10-17	Night	OK	Torrens point	3	1		spotted lobster	4.2	4.2	1	1.66667	macro
2023-10-17	Night	OK	Torrens point	3	2		brittle star	0-.5	0.25	29	48.3333	micro
2023-10-17	Night	OK	Torrens point	3	2		brittle star	1-1.5	1.25	3	5	micro
2023-10-17	Night	OK	Torrens point	3	2		crab other	1.3	1.3	1	1.66667	micro
2023-10-17	Night	OK	Torrens point	3	2		shrimp	0-.5	0.25	3	5	micro
2023-10-17	Night	OK	Torrens point	3	2		spotted lobster	4.4	4.4	1	1.66667	macro
2023-10-17	Night	OK	Torrens point	3	2		hermit crab	2.4	2.4	1	1.66667	micro
2023-10-17	Night	OK	Torrens point	3	2		shrimp	0-.5	0.25	2	3.33333	micro
2023-10-17	Night	OK	Torrens point	3	3		brittle star	0-.5	0.25	55	91.6667	micro
2023-10-17	Night	OK	Torrens point	3	3		brittle star	1-1.5	1.25	7	11.6667	micro
2023-10-17	Night	OK	Torrens point	3	3		brittle star	1.5-2	1.75	1	1.66667	micro
2023-10-17	Night	OK	Ladder bay	3	1		hermit crab	1.1	1.1	1	1.66667	micro
2023-10-17	Night	OK	Ladder bay	3	1		hermit crab	0.8	0.8	1	1.66667	micro
2023-10-17	Night	OK	Ladder bay	3	1		brittle star	0-.5	0.25	5	8.33333	micro
2023-10-17	Night	OK	Ladder bay	3	1		shrimp	0.6	0.6	1	1.66667	micro	pederson cleaner shrimp
2023-10-17	Night	OK	Ladder bay	3	1		crab other	0.7	0.7	1	1.66667	micro
2023-10-17	Night	OK	Ladder bay	3	1		hermit crab	2.2	2.2	1	1.66667	micro
2023-10-17	Night	OK	Ladder bay	3	1		hermit crab	0.9	0.9	1	1.66667	micro
2023-10-17	Night	OK	Ladder bay	3	1		shrimp	0-.5	0.25	1	1.66667	micro
2023-10-17	Night	OK	Ladder bay	3	2		brittle star	0-.5	0.25	9	15	micro
2023-10-17	Night	OK	Ladder bay	3	2		shrimp	0-.5	0.25	13	21.6667	micro
2023-10-17	Night	OK	Ladder bay	3	2		hermit crab	0.5	0.5	1	1.66667	micro
2023-10-17	Night	OK	Ladder bay	3	2		hermit crab	8.6	8.6	1	1.66667	macro
2023-10-17	Night	OK	Ladder bay	3	3		hermit crab	1.5	1.5	1	1.66667	micro
2023-10-17	Night	OK	Ladder bay	3	3		shrimp	0-.5	0.25	46	76.6667	micro
2023-10-17	Night	OK	Ladder bay	3	3		shrimp	.5-1	0.75	3	5	micro
2023-10-17	Night	OK	Ladder bay	3	3		crab other	0.2	0.2	1	1.66667	micro
2023-10-17	Night	OK	Ladder bay	3	3		brittle star	0-.5	0.25	7	11.6667	micro
2023-10-17	Night	OK	Ladder bay	3	3		hermit crab	0.7	0.7	1	1.66667	micro

## Sheet: Inverts per 100m2
Common name	Location	Survey	Transect	Number_micro	Number_macro
hermit crab	Diadema city	1	1	1.66667	0
shrimp	Diadema city	1	1	633.333	0
spotted lobster	Diadema city	1	1	0	0
crab other	Diadema city	1	1	0	0
arrow crab	Diadema city	1	1	0	0
Spiny lobster	Diadema city	1	1	0	0
helmet conch	Diadema city	1	1	0	0
hermit crab	Diadema city	1	2	0	3.33333
shrimp	Diadema city	1	2	1025	0
spotted lobster	Diadema city	1	2	0	1.66667
crab other	Diadema city	1	2	0	0
arrow crab	Diadema city	1	2	0	0
Spiny lobster	Diadema city	1	2	0	0
helmet conch	Diadema city	1	2	0	0
hermit crab	Diadema city	1	3	1.66667	0
shrimp	Diadema city	1	3	346.667	0
spotted lobster	Diadema city	1	3	0	1.66667
crab other	Diadema city	1	3	0	0
arrow crab	Diadema city	1	3	0	0
Spiny lobster	Diadema city	1	3	0	0
helmet conch	Diadema city	1	3	0	0
hermit crab	Diadema city	2	1	6.66667	0
shrimp	Diadema city	2	1	633.333	0
spotted lobster	Diadema city	2	1	0	5
crab other	Diadema city	2	1	1.66667	0
arrow crab	Diadema city	2	1	0	0
Spiny lobster	Diadema city	2	1	0	0
helmet conch	Diadema city	2	1	0	0
hermit crab	Diadema city	2	2	0	1.66667
shrimp	Diadema city	2	2	1016.67	0
spotted lobster	Diadema city	2	2	0	1.66667
crab other	Diadema city	2	2	0	0
arrow crab	Diadema city	2	2	0	0
Spiny lobster	Diadema city	2	2	0	0
helmet conch	Diadema city	2	2	0	0
hermit crab	Diadema city	2	3	0	0
shrimp	Diadema city	2	3	1065	0
spotted lobster	Diadema city	2	3	0	0
crab other	Diadema city	2	3	0	0
arrow crab	Diadema city	2	3	0	0
Spiny lobster	Diadema city	2	3	0	0
helmet conch	Diadema city	2	3	0	0
hermit crab	Diadema city	3	1	0	0
shrimp	Diadema city	3	1	1130	0
spotted lobster	Diadema city	3	1	0	0
crab other	Diadema city	3	1	1.66667	0
arrow crab	Diadema city	3	1	0	0
Spiny lobster	Diadema city	3	1	0	0
helmet conch	Diadema city	3	1	0	0
hermit crab	Diadema city	3	2	0	3.33333
shrimp	Diadema city	3	2	1798.33	0
spotted lobster	Diadema city	3	2	0	0
crab other	Diadema city	3	2	0	0
arrow crab	Diadema city	3	2	0	0
Spiny lobster	Diadema city	3	2	0	1.66667
helmet conch	Diadema city	3	2	0	0
hermit crab	Diadema city	3	3	0	0
shrimp	Diadema city	3	3	450	0
spotted lobster	Diadema city	3	3	0	3.33333
crab other	Diadema city	3	3	1.66667	0
arrow crab	Diadema city	3	3	0	0
Spiny lobster	Diadema city	3	3	0	0
helmet conch	Diadema city	3	3	0	0
hermit crab	Tent reef	1	1	1.66667	0
shrimp	Tent reef	1	1	65	0
spotted lobster	Tent reef	1	1	0	1.66667
crab other	Tent reef	1	1	3.33333	0
arrow crab	Tent reef	1	1	0	0
Spiny lobster	Tent reef	1	1	0	0
helmet conch	Tent reef	1	1	0	0
hermit crab	Tent reef	1	2	1.66667	0
shrimp	Tent reef	1	2	75	0
spotted lobster	Tent reef	1	2	0	0
crab other	Tent reef	1	2	0	0
arrow crab	Tent reef	1	2	0	0
Spiny lobster	Tent reef	1	2	0	0
helmet conch	Tent reef	1	2	0	0
hermit crab	Tent reef	1	3	0	0
shrimp	Tent reef	1	3	78.3333	0
spotted lobster	Tent reef	1	3	0	0
crab other	Tent reef	1	3	0	0
arrow crab	Tent reef	1	3	0	0
Spiny lobster	Tent reef	1	3	0	0
helmet conch	Tent reef	1	3	0	0
hermit crab	Tent reef	2	1	1.66667	0
shrimp	Tent reef	2	1	56.6667	0
spotted lobster	Tent reef	2	1	0	1.66667
crab other	Tent reef	2	1	0	0
arrow crab	Tent reef	2	1	0	0
Spiny lobster	Tent reef	2	1	0	0
helmet conch	Tent reef	2	1	0	0
hermit crab	Tent reef	2	2	0	0
shrimp	Tent reef	2	2	101.667	0
spotted lobster	Tent reef	2	2	0	1.66667
crab other	Tent reef	2	2	6.66667	0
arrow crab	Tent reef	2	2	0	0
Spiny lobster	Tent reef	2	2	0	0
helmet conch	Tent reef	2	2	0	0
hermit crab	Tent reef	2	3	0	0
shrimp	Tent reef	2	3	96.6667	0
spotted lobster	Tent reef	2	3	0	0
crab other	Tent reef	2	3	0	0
arrow crab	Tent reef	2	3	0	0
Spiny lobster	Tent reef	2	3	0	1.66667
helmet conch	Tent reef	2	3	0	0
hermit crab	Tent reef	3	1	1.66667	0
shrimp	Tent reef	3	1	15	0
spotted lobster	Tent reef	3	1	0	1.66667
crab other	Tent reef	3	1	5	0
arrow crab	Tent reef	3	1	0	0
Spiny lobster	Tent reef	3	1	0	0
helmet conch	Tent reef	3	1	1.66667	0
hermit crab	Tent reef	3	2	0	0
shrimp	Tent reef	3	2	13.3333	0
spotted lobster	Tent reef	3	2	0	0
crab other	Tent reef	3	2	1.66667	0
arrow crab	Tent reef	3	2	0	0
Spiny lobster	Tent reef	3	2	0	0
helmet conch	Tent reef	3	2	0	0
hermit crab	Tent reef	3	3	0	0
shrimp	Tent reef	3	3	3.33333	0
spotted lobster	Tent reef	3	3	0	0
crab other	Tent reef	3	3	1.66667	0
arrow crab	Tent reef	3	3	0	0
Spiny lobster	Tent reef	3	3	0	0
helmet conch	Tent reef	3	3	0	0
hermit crab	Ladder bay	1	1	3.33333	1.66667
shrimp	Ladder bay	1	1	25	0
spotted lobster	Ladder bay	1	1	0	0
crab other	Ladder bay	1	1	0	0
arrow crab	Ladder bay	1	1	0	0
Spiny lobster	Ladder bay	1	1	0	0
helmet conch	Ladder bay	1	1	0	0
hermit crab	Ladder bay	1	2	0	0
shrimp	Ladder bay	1	2	68.3333	0
spotted lobster	Ladder bay	1	2	0	0
crab other	Ladder bay	1	2	1.66667	0
arrow crab	Ladder bay	1	2	0	0
Spiny lobster	Ladder bay	1	2	0	0
helmet conch	Ladder bay	1	2	0	0
hermit crab	Ladder bay	1	3	3.33333	0
shrimp	Ladder bay	1	3	36.6667	0
spotted lobster	Ladder bay	1	3	0	0
crab other	Ladder bay	1	3	0	0
arrow crab	Ladder bay	1	3	0	0
Spiny lobster	Ladder bay	1	3	0	0
helmet conch	Ladder bay	1	3	0	1.66667
hermit crab	Ladder bay	2	1	0	0
shrimp	Ladder bay	2	1	6.66667	0
spotted lobster	Ladder bay	2	1	0	0
crab other	Ladder bay	2	1	0	0
arrow crab	Ladder bay	2	1	0	0
Spiny lobster	Ladder bay	2	1	0	0
helmet conch	Ladder bay	2	1	0	0
hermit crab	Ladder bay	2	2	1.66667	1.66667
shrimp	Ladder bay	2	2	1.66667	0
spotted lobster	Ladder bay	2	2	0	0
crab other	Ladder bay	2	2	0	0
arrow crab	Ladder bay	2	2	0	0
Spiny lobster	Ladder bay	2	2	0	0
helmet conch	Ladder bay	2	2	0	0
hermit crab	Ladder bay	2	3	3.33333	1.66667
shrimp	Ladder bay	2	3	0	0
spotted lobster	Ladder bay	2	3	0	0
crab other	Ladder bay	2	3	0	0
arrow crab	Ladder bay	2	3	0	0
Spiny lobster	Ladder bay	2	3	0	0
helmet conch	Ladder bay	2	3	0	0
hermit crab	Ladder bay	3	1	6.66667	0
shrimp	Ladder bay	3	1	3.33333	0
spotted lobster	Ladder bay	3	1	0	0
crab other	Ladder bay	3	1	0	0
arrow crab	Ladder bay	3	1	0	0
Spiny lobster	Ladder bay	3	1	0	0
helmet conch	Ladder bay	3	1	0	0
hermit crab	Ladder bay	3	2	1.66667	1.66667
shrimp	Ladder bay	3	2	21.6667	0
spotted lobster	Ladder bay	3	2	0	0
crab other	Ladder bay	3	2	0	0
arrow crab	Ladder bay	3	2	0	0
Spiny lobster	Ladder bay	3	2	0	0
helmet conch	Ladder bay	3	2	0	0
hermit crab	Ladder bay	3	3	3.33333	0
shrimp	Ladder bay	3	3	81.6667	0
spotted lobster	Ladder bay	3	3	0	0
crab other	Ladder bay	3	3	1.66667	0
arrow crab	Ladder bay	3	3	0	0
Spiny lobster	Ladder bay	3	3	0	0
helmet conch	Ladder bay	3	3	0	0
hermit crab	Torrens point	1	1	0	0
shrimp	Torrens point	1	1	8.33333	0
spotted lobster	Torrens point	1	1	0	1.66667
crab other	Torrens point	1	1	0	0
arrow crab	Torrens point	1	1	0	0
Spiny lobster	Torrens point	1	1	0	0
helmet conch	Torrens point	1	1	0	0
hermit crab	Torrens point	1	2	3.33333	0
shrimp	Torrens point	1	2	0	0
spotted lobster	Torrens point	1	2	0	0
crab other	Torrens point	1	2	0	0
arrow crab	Torrens point	1	2	0	0
Spiny lobster	Torrens point	1	2	0	0
helmet conch	Torrens point	1	2	0	0
hermit crab	Torrens point	1	3	0	3.33333
shrimp	Torrens point	1	3	1.66667	0
spotted lobster	Torrens point	1	3	0	0
crab other	Torrens point	1	3	0	0
arrow crab	Torrens point	1	3	0	0
Spiny lobster	Torrens point	1	3	0	0
helmet conch	Torrens point	1	3	0	0
hermit crab	Torrens point	2	1	0	0
shrimp	Torrens point	2	1	56.6667	0
spotted lobster	Torrens point	2	1	0	0
crab other	Torrens point	2	1	1.66667	0
arrow crab	Torrens point	2	1	0	0
Spiny lobster	Torrens point	2	1	0	0
helmet conch	Torrens point	2	1	0	0
hermit crab	Torrens point	2	2	3.33333	1.66667
shrimp	Torrens point	2	2	45	0
spotted lobster	Torrens point	2	2	0	0
crab other	Torrens point	2	2	1.66667	0
arrow crab	Torrens point	2	2	0	0
Spiny lobster	Torrens point	2	2	0	0
helmet conch	Torrens point	2	2	0	0
hermit crab	Torrens point	2	3	1.66667	1.66667
shrimp	Torrens point	2	3	68.3333	0
spotted lobster	Torrens point	2	3	0	0
crab other	Torrens point	2	3	0	0
arrow crab	Torrens point	2	3	0	0
Spiny lobster	Torrens point	2	3	0	0
helmet conch	Torrens point	2	3	0	0
hermit crab	Torrens point	3	1	0	0
shrimp	Torrens point	3	1	15	0
spotted lobster	Torrens point	3	1	1.66667	1.66667
crab other	Torrens point	3	1	0	0
arrow crab	Torrens point	3	1	0	0
Spiny lobster	Torrens point	3	1	0	0
helmet conch	Torrens point	3	1	0	0
hermit crab	Torrens point	3	2	1.66667	0
shrimp	Torrens point	3	2	8.33333	0
spotted lobster	Torrens point	3	2	0	1.66667
crab other	Torrens point	3	2	0	0
arrow crab	Torrens point	3	2	0	0
Spiny lobster	Torrens point	3	2	0	0
helmet conch	Torrens point	3	2	0	0
hermit crab	Torrens point	3	3	0	0
shrimp	Torrens point	3	3	0	0
spotted lobster	Torrens point	3	3	0	0
crab other	Torrens point	3	3	0	0
arrow crab	Torrens point	3	3	0	0
Spiny lobster	Torrens point	3	3	0	0
helmet conch	Torrens point	3	3	0	0

[truncated: 2 more sheets: Inverts per 100m2 total, Depth measurements]
